# Supplementary material for: Mammalian forelimb evolution is driven by uneven proximal-to-distal morphological diversity
Source: eLife. 2023 Jan 26;12:e81492. doi: 10.7554/eLife.81492 (PMC9908075; doi:10.7554/eLife.81492)
Supplement: Supplementary file 1. [file elife-81492-supp1.xlsx]

## Sheet: Feuil1
Supplementary file 1
Supplementary file 1. Analyzed specimens, indicating taxonomy, institutional identification, method of morphometric acquisition, MorphoSource ID and associated projects (when applicable) and body mass (grams, from PanTHERIA or indicated literature).
	Superordinal Group	Order	Family	Species	Institution Voucher	Method	MorphoSouce ID	MorphoSource Media Project	Sex	Body Mass g	OBS	Body mass reference (if not PanTHERIA)
1	Laurasiatheria	Cetartiodactyla	Balaenopteridae	Megaptera_novaeangliae	MNHN-ZM-AC-A2931	Caliper	-	-		3e+07
2	Laurasiatheria	Cetartiodactyla	Balaenidae	Eubalaena_australis	MNHN-ZM-AC-1921-123	Caliper	-	-		2.3e+07
3	Laurasiatheria	Cetartiodactyla	Ziphiidae	Berardius_arnuxii	MNHN-ZM-AC-1875-712	Caliper	-	-		7e+06
4	Laurasiatheria	Cetartiodactyla	Delphinidae	Orcinus_orca	MNHN-ZM-AC-1885-427	Caliper	-	-	female	5.62876e+06
5	Laurasiatheria	Cetartiodactyla	Balaenopteridae	Balaenoptera_acutorostrata	MNHN-ZM-AC-1881-1225	Caliper	-	-		5.58709e+06
6	Laurasiatheria	Cetartiodactyla	Ziphiidae	Mesoplodon_bidens	MNHN-ZM-AC-1909-81	Caliper	-	-	male	3400000
7	Laurasiatheria	Cetartiodactyla	Ziphiidae	Hyperoodon_ampullatus	MNHN-ZM-AC-A3236	Caliper	-	-		3.39336e+06
8	Afrotheria	Proboscidea	Elephantidae	Elephas_maximus	MNHN-ZM-AC-1900-492	Caliper	-	-	female	3.26979e+06
9	Laurasiatheria	Perissodactyla	Rhinocerotidae	Ceratotherium_simum	MNHN-ZM-AC-A7968	Caliper	-	-	female	2.28594e+06
10	Laurasiatheria	Perissodactyla	Rhinocerotidae	Rhinoceros_unicornis	MNHN-ZM-AC-1960-59	Caliper	-	-	male	1.84366e+06
11	Laurasiatheria	Perissodactyla	Rhinocerotidae	Rhinoceros_sondaicus	MNHN-ZM-AC-A7971	Caliper	-	-		1750000
12	Laurasiatheria	Cetartiodactyla	Hippopotamidae	Hippopotamus_amphibius	MNHN-ZM-AC-1897-33	Caliper	-	-	female	1.53631e+06
13	Laurasiatheria	Cetartiodactyla	Hippopotamidae	Hippopotamus_amphibius	MNHN-ZM-AC-1943-27	Caliper	-	-	female	1.53631e+06
14	Laurasiatheria	Cetartiodactyla	Monodontidae	Delphinapterus_leucas	MNHN-ZM-AC-A3246	Caliper	-	-		1.38164e+06
15	Laurasiatheria	Perissodactyla	Rhinocerotidae	Dicerorhinus_sumatrensis	MNHN-ZM-AC-A7967	Caliper	-	-	female	1.04616e+06
16	Laurasiatheria	Carnivora	Odobenidae	Odobenus_rosmarus	MNHN-ZM-AC-1913-490	Caliper	-	-	male	1.043e+06
17	Laurasiatheria	Perissodactyla	Rhinocerotidae	Diceros_bicornis	MNHN-ZM-AC-1944-278	Caliper	-	-	male	995941
18	Laurasiatheria	Cetartiodactyla	Giraffidae	Giraffa_camelopardalis	MNHN-A8012	Caliper	-	-	female	964655
19	Laurasiatheria	Cetartiodactyla	Monodontidae	Monodon_monoceros	MNHN-ZM-AC-A12536	Caliper	-	-		938126
20	Laurasiatheria	Cetartiodactyla	Bovidae	Bubalus_bubalis	MNHN-ZM-AC-1902-905	Caliper	-	-		929501
21	Laurasiatheria	Cetartiodactyla	Bovidae	Bos_frontalis	MNHN-ZM-AC-1970-280	Caliper	-	-	male	800143
22	Laurasiatheria	Cetartiodactyla	Delphinidae	Globicephala_melas	MNHN-ZM-AC-1902-902	Caliper	-	-	female	800000
23	Laurasiatheria	Cetartiodactyla	Bovidae	Bison_bonasus	MNHN-ZM-AC-1962-222	Caliper	-	-	female	675877
24	Laurasiatheria	Cetartiodactyla	Bovidae	Syncerus_caffer	MNHN-1936-72	Caliper	-	-		592666
25	Laurasiatheria	Cetartiodactyla	Camelidae	Camelus_bactrianus	MNHN-ZM-AC-1898239	Caliper	-	-	female	554516
26	Laurasiatheria	Cetartiodactyla	Bovidae	Bos_grunniens	MNHN-2008-107	Caliper	-	-		500000
27	Laurasiatheria	Cetartiodactyla	Camelidae	Camelus_dromedarius	MNHN-ZM-AC-1876-259	Caliper	-	-	female	492714
28	Laurasiatheria	Cetartiodactyla	Cervidae	Alces_alces	MNHN-2019-1315	Caliper	-	-		461901
29	Afrotheria	Sirenia	Trichechidae	Trichechus_senegalensis	MNHN-ZM-AC-1924-354	Caliper	-	-		454000
30	Laurasiatheria	Perissodactyla	Equidae	Equus_grevyi	MNHN-ZM-AC-1913-58	Caliper	-	-	male	408000
31	Laurasiatheria	Perissodactyla	Equidae	Equus_caballus	MNHN-ZM-AC-1911-145	Caliper	-	-	male	403599
32	Laurasiatheria	Cetartiodactyla	Delphinidae	Grampus_griseus	MNHN-ZM-AC-1881-1186	Caliper	-	-		387500
33	Laurasiatheria	Carnivora	Ursidae	Ursus_maritimus	MNHN-1012-139	Caliper	-	-		371704
34	Laurasiatheria	Carnivora	Phocidae	Hydrurga_leptonyx	MNHN-ZM-AC-1970-325	Caliper	-	-		352675
35	Afrotheria	Sirenia	Dugongidae	Dugong_dugon	MNHN-ZM-AC-1875-279	Caliper	-	-		295000
36	Afrotheria	Sirenia	Dugongidae	Dugong_dugon	MNHN-ZM-AC-1883-241	Caliper	-	-	female	295000
37	Laurasiatheria	Cetartiodactyla	Bovidae	Budorcas_taxicolor	MNHN-ZM-AC-1925-240	Caliper	-	-		294515
38	Laurasiatheria	Cetartiodactyla	Delphinidae	Tursiops_truncatus	MNHN-1978-09	Caliper	-	-		281041
39	Laurasiatheria	Cetartiodactyla	Bovidae	Hippotragus_equinus	MNHN-ZM-AC-1995-147	Caliper	-	-	female	264174
40	Laurasiatheria	Cetartiodactyla	Cervidae	Cervus_elaphus	MNHN-1980-4026	Caliper	-	-		240867
41	Laurasiatheria	Perissodactyla	Equidae	Equus_hemionus	MHNH-ZM-AC-1902-487	Caliper	-	-	female	235248
42	Laurasiatheria	Cetartiodactyla	Hippopotamidae	Choeropsis_liberiensis	MNHN-ZM-AC-1944-146	Caliper	-	-	male	235001
43	Laurasiatheria	Cetartiodactyla	Hippopotamidae	Choeropsis_liberiensis	MNHN-ZM-AC-1982-10	Caliper	-	-	male	235001
44	Laurasiatheria	Cetartiodactyla	Giraffidae	Okapia_johnstoni	MNHN-ZM-AC-1904-57	Caliper	-	-	male	230001
45	Laurasiatheria	Cetartiodactyla	Bovidae	Tragelaphus_strepsiceros	MNHN-ZM-AC-1992-1462	Caliper	-	-	male	206056
46	Laurasiatheria	Cetartiodactyla	Bovidae	Kobus_ellipsiprymnus	MNHN-1935-637	Caliper	-	-		204393
47	Laurasiatheria	Cetartiodactyla	Bovidae	Connochaetes_taurinus	MNHN-1938-86	Caliper	-	-		198620
48	Laurasiatheria	Carnivora	Phocidae	Halichoerus_grypus	MNHN-squelette monté	Caliper	-	-		197570
49	Laurasiatheria	Carnivora	Otariidae	Otaria_byronia	MNHN-ZM-AC-1891-1083	Caliper	-	-	female	193671
50	Laurasiatheria	Cetartiodactyla	Delphinidae	Orcaella_brevirostris	MNHN-ZM-AC-1888-388	Caliper	-	-		190000
51	Laurasiatheria	Cetartiodactyla	Bovidae	Oryx_gazella	MNHN-ZM-2005-712	Caliper	-	-		188404
52	Laurasiatheria	Cetartiodactyla	Delphinidae	Lagenorhynchus_acutus	MNHN-ZM-AC-1881-1226	Caliper	-	-		186518
53	Laurasiatheria	Cetartiodactyla	Bovidae	Boselaphus_tragocamelus	MNHN-ZM-AC-1907-146	Caliper	-	-	male	182253
54	Laurasiatheria	Cetartiodactyla	Cervidae	Rusa_unicolor	MNHN-ZM-AC-1886-09	Caliper	-	-	female	177523
55	Laurasiatheria	Cetartiodactyla	Cervidae	Rucervus_duvaucelii	MNHN-ZM-2013-1075	Caliper	-	-	male	171224
56	Laurasiatheria	Perissodactyla	Tapiridae	Tapirus_terrestris	MNHN-ZM-AC-1937-1	Caliper	-	-		169497
57	Laurasiatheria	Cetartiodactyla	Bovidae	Alcelaphus_buselaphus	MNHN-1862-58	Caliper	-	-		168696
58	Laurasiatheria	Cetartiodactyla	Cervidae	Elaphurus_davidianus	MNHN-ZM-AC-1972-67	Caliper	-	-	female	165989
59	Laurasiatheria	Perissodactyla	Equidae	Equus_asinus	MHNH-ZM-AC-1893-634	Caliper	-	-	male	164998
60	Laurasiatheria	Carnivora	Felidae	Panthera_leo	MNHN-ZM-2020-1586	Caliper	-	-	female	158624
61	Laurasiatheria	Perissodactyla	Tapiridae	Tapirus_pichaque	MNHN-ZM-AC-1982-34	Caliper	-	-	male	156923
62	Laurasiatheria	Carnivora	Otariidae	Zalophus_californianus	MNHN-ZM-AC-1882-190	Caliper	-	-		137195
63	Laurasiatheria	Cetartiodactyla	Delphinidae	Steno_bredanensis	MNHN-ZM-AC-1885-300	Caliper	-	-		130000
64	Laurasiatheria	Carnivora	Ursidae	Tremarctos_ornatus	MNHN-1990-696	Caliper	-	-		123177
65	Laurasiatheria	Cetartiodactyla	Iniidae	Inia_geoffrensis	MNHN-ZM-AC-1865-154	Caliper	-	-		121431
66	Laurasiatheria	Carnivora	Ursidae	Ailuropoda_melanoleuca	MNHN-1870-293	Caliper	-	-		118000
67	Euarchontoglires	Primates	Hominidae	Gorilla_gorilla	YPM:VZ:Mamm:014997	Digital	ark:/87602/m4/M54448	Yale Peabody Museum Vertebrate Zoology	male	112589
68	Laurasiatheria	Cetartiodactyla	Bovidae	Capricornis_sumatraensis	MNHN-ZM-AC-1937-314	Caliper	-	-		110942
69	Laurasiatheria	Cetartiodactyla	Cervidae	Rangifer_tarandus	MNHN-ZM-AC-1945-29	Caliper	-	-	female	109088
70	Laurasiatheria	Cetartiodactyla	Suidae	Sus_sp	MNHN-1938-70	Caliper	-	-		107579	Body mass of genus average.
71	Laurasiatheria	Carnivora	Ursidae	Melursus_ursinus	MNHN-ZM-AC-1871-85	Caliper	-	-		100000
72	Laurasiatheria	Cetartiodactyla	Bovidae	Addax_nasomaculatus	MNHN-1970-277	Caliper	-	-	female	96077.4
73	Laurasiatheria	Cetartiodactyla	Bovidae	Ammotragus_lervia	MNHN-ZM-AC-1896-439	Caliper	-	-	male	94202.2
74	Laurasiatheria	Cetartiodactyla	Platanistidae	Platanista_gangetica	MNHN-ZM-AC-A7943	Caliper	-	-		93482
75	Laurasiatheria	Carnivora	Phocidae	Phoca_vitulina	MNHN-ZM-AC-1934-603	Caliper	-	-		87316.7
76	Laurasiatheria	Cetartiodactyla	Suidae	Phacochoerus_africanus	MNHN-ZM-AC-1923-2433	Caliper	-	-	male	82500
77	Laurasiatheria	Cetartiodactyla	Suidae	Phacochoerus_africanus	MNHN-1900-49	Caliper	-	-		82500
78	Laurasiatheria	Cetartiodactyla	Delphinidae	Delphinus_delphis	MNHN-ZM-AC-1934-367	Caliper	-	-	female	79271.7
79	Laurasiatheria	Cetartiodactyla	Camelidae	Lama_glama	MNHN-ZM-AC-1987-16	Caliper	-	-	female	78322.7
80	Laurasiatheria	Cetartiodactyla	Camelidae	Lama_guanicoe	MNHN-ZM-AC-1925-200	Caliper	-	-	female	78322.7	L. glama body mass.
81	Laurasiatheria	Cetartiodactyla	Bovidae	Damaliscus_pygargus	MNHN-1970-384	Caliper	-	-	male	77784.6
82	Laurasiatheria	Cetartiodactyla	Cervidae	Odocoileus_virginianus	MNHN-ZM-AC-1876-312	Caliper	-	-	male	75901.2
83	Laurasiatheria	Cetartiodactyla	Delphinidae	Cephalorhynchus_commersonii	MNHN-ZM-AC-1983-56	Caliper	-	-	female	72400
84	Laurasiatheria	Cetartiodactyla	Delphinidae	Cephalorhynchus_commersonii	MNHN-ZM-1983-58	Caliper	-	-	male	72400
85	Laurasiatheria	Cetartiodactyla	Bovidae	Oreamnos_americanus	MNHN-ZM-AC-1925-437	Caliper	-	-	male	72105.4
86	Laurasiatheria	Cetartiodactyla	Bovidae	Nanger_dama	MNHN-1882-264	Caliper	-	-		71424.8
87	Laurasiatheria	Carnivora	Phocidae	Pusa_hispida	MNHN-ZM-AC-A7954	Caliper	-	-	female	70963.6
88	Laurasiatheria	Cetartiodactyla	Cervidae	Axis_axis	MNHN-ZM-AC-1860-187	Caliper	-	-	male	69500
89	Laurasiatheria	Cetartiodactyla	Suidae	Potamochoerus_larvatus	MNHN-ZM-AC-1876-454	Caliper	-	-	female	69063.8
90	Laurasiatheria	Cetartiodactyla	Bovidae	Hemitragus_jemlahicus	MNHN-1991-693	Caliper	-	-		68616.4
91	Laurasiatheria	Carnivora	Hyaenidae	Crocuta_crocuta	MNHN-1938-87	Caliper	-	-		63370
92	Euarchontoglires	Primates	Hominidae	Homo_sapiens	MNHN-ZM-AC-1928-273	Caliper	-	-	male	58540.6
93	Laurasiatheria	Cetartiodactyla	Cervidae	Dama_dama	MNHN-ZM-AC-1882-128	Caliper	-	-	male	57224.6
94	Afrotheria	Tubulidentata	Orycteropodidae	Orycteropus_afer	MNHN-1919-16	Caliper	-	-		56175.2
95	Afrotheria	Tubulidentata	Orycteropodidae	Orycteropus_afer	MNHN-1919-19	Caliper	-	-		56175.2
96	Laurasiatheria	Carnivora	Otariidae	Callorhinus_ursinus	MNHN-ZM-AC-1900-165	Caliper	-	-	female	55464.8
97	Euarchontoglires	Primates	Hominidae	Pongo_pygmaeus	MNHN-ZM-2014-574	Caliper	-	-	male	53408.3
98	Laurasiatheria	Cetartiodactyla	Phocoenidae	Phocoena_phocoena	MNHN-B11209	Caliper	-	-		52730.9
99	Laurasiatheria	Cetartiodactyla	Bovidae	Aepyceros_melampus	MNHN-1973-39	Caliper	-	-		52591.7
100	Laurasiatheria	Cetartiodactyla	Bovidae	Pseudois_nayaur	MNHN-1995-197	Caliper	-	-		52334.6
101	Laurasiatheria	Carnivora	Felidae	Acinonyx_jubatus	MNHN-1933-124	Caliper	-	-		50577.9
102	Laurasiatheria	Cetartiodactyla	Delphinidae	Stenella_longirostris	MNHN-ZM-AC-1882-104	Caliper	-	-		50500
103	Euarchontoglires	Rodentia	Caviidae	Hydrochoerus_hydrochaeris	MNHN-ZM-AC-1929-492	Caliper	-	-		48144.9
104	Laurasiatheria	Cetartiodactyla	Bovidae	Capra_hircus	MNHN-1921-30	Caliper	-	-		47386.5
105	Laurasiatheria	Cetartiodactyla	Bovidae	Capra_ibex	MNHN-ZM-2019-1646	Caliper	-	-	male	43500	Body mass of specimen provided by collection.
106	Laurasiatheria	Cetartiodactyla	Bovidae	Redunca_redunca	MNHN-ZM-AC-1924-45	Caliper	-	-	Male	43288.9
107	Xenarthra	Cingulata	Chlamyphoridae	Priodontes_maximus	MNHN-1885-389	Caliper	-	-		40641.9
108	Laurasiatheria	Cetartiodactyla	Pontoporiidae	Pontoporia_blainvillei	MNHN-ZM-AC-1928-278	Caliper	-	-		40500
109	Laurasiatheria	Cetartiodactyla	Pontoporiidae	Pontoporia_blainvillei	MNHN-1828-167	Caliper	-	-		40500
110	Laurasiatheria	Cetartiodactyla	Bovidae	Ovis_aries	MNHN-1907-579	Caliper	-	-		39097.9
111	Laurasiatheria	Cetartiodactyla	Bovidae	Saiga_tatarica	MNHN-1965-128	Caliper	-	-		37734
112	Laurasiatheria	Cetartiodactyla	Bovidae	Antilope_cervicapra	MNHN-1886-321	Caliper	-	-		36301.1
113	Euarchontoglires	Primates	Hominidae	Pan_paniscus	AMNH:Mamm:m-202870	Digital	ark:/87602/m4/M38741	AMNH Mammal Collections; The oVert TCN	male	35119.9
114	Laurasiatheria	Carnivora	Hyaenidae	Hyaena_hyaena	MNHN-ZM-AC-1883-1570	Caliper	-	-	male	35070.5
115	Laurasiatheria	Cetartiodactyla	Bovidae	Antidorcas_marsupialis	MNHN-1971-89	Caliper	-	-		33571.2
116	Marsupialia	Diprotodontia	Macropodidae	Macropus_giganteus	MNHN-1970-11	Caliper	-	-		33409.9
117	Laurasiatheria	Cetartiodactyla	Bovidae	Rupicapra_rupicapra	MNHN-ZM-AC-1924-262	Caliper	-	-	Male	33266.3
118	Laurasiatheria	Pholidota	Manidae	Smutsia_gigantea	MNHN-1869-760	Caliper	-	-		32999.7
119	Laurasiatheria	Cetartiodactyla	Tayassuidae	Tayassu_pecari	MNHN-1892-1107	Caliper	-	-		31798.7
120	Laurasiatheria	Carnivora	Canidae	Canis_lupus	MNHN-1962-4165	Caliper	-	-	female	31756.5
121	Marsupialia	Dasyuromorpha	Thylacidae	Thylacinus_cynocephalus	NRM:566599	Digital	doi:10.17602/M2/M158442	Thylacine Whole Body 3D Surfaces; Rovinsky, D.S.; Evans, A.R.; Martin, D.G.; Adams, J.W. 2020. Did the thylacine violate the costs of carnivory? Body mass and sexual dimorphism of an iconic Australian marsupial. Proc. R. Soc. B.		30000
122	Xenarthra	Pilosa	Myrmecophagidae	Myrmecophaga_tridactyla	MNHN-ZM-AC-1880-1433	Caliper	-	-		29531.8
123	Laurasiatheria	Carnivora	Mustelidae	Enhydra_lutris	MNHN-ZM-AC-A12503	Caliper	-	-		27410.9
124	Marsupialia	Diprotodontia	Vombatidae	Lasiorhinus_latifrons	MNHN-1869-761	Caliper	-	-		26163.8
125	Laurasiatheria	Carnivora	Mustelidae	Pteronura_brasiliensis	MNHN-A1618	Caliper	-	-		26000
126	Marsupialia	Diprotodontia	Vombatidae	Vombatus_ursinus	UMZC:Vertebrates:a10. 10/2	Digital	ark:/87602/m4/M83581	TEMPO Mammals; Martín-Serra, A. and Benson, R.B. 2020. Developmental constraints do not influence long-term phenotypic evolution of marsupial forelimbs as revealed by interspecific disparity and integration patterns. The Am. Nat. 195(3): 547-560.		26000
127	Laurasiatheria	Cetartiodactyla	Bovidae	Eudorcas_thomsonii	MNHN-1961-41	Caliper	-	-		22907.4
128	Laurasiatheria	Cetartiodactyla	Bovidae	Pelea_capreolos	MNHN-A11898	Caliper	-	-		22731.3
129	Laurasiatheria	Cetartiodactyla	Cervidae	Capreolus_capreolus	MNHN-ZM-AC-1993-266	Caliper	-	-	male	22502
130	Laurasiatheria	Carnivora	Canidae	Lycaon_pictus	MNHN-1902-629	Caliper	-	-		22000
131	Laurasiatheria	Cetartiodactyla	Tayassuidae	Pecari_tajacu	MNHN-ZM-AC-1909-492	Caliper	-	-		21133.7
132	Laurasiatheria	Cetartiodactyla	Tayassuidae	Pecari_tajacu	MNHN-1879-192	Caliper	-	-		21133.7
133	Laurasiatheria	Cetartiodactyla	Bovidae	Gazella_sp	MNHN-1923-2137	Caliper	-	-		20951.4	Body mass of genus average.
134	Laurasiatheria	Cetartiodactyla	Bovidae	Cephalophus_dorsalis	MNHN-1971-306	Caliper	-	-		20000
135	Laurasiatheria	Carnivora	Mustelidae	Aonyx_capensis	MNHN-ZM-AC-A3388	Caliper	-	-		19322.2
136	Laurasiatheria	Cetartiodactyla	Bovidae	Tetracerus_quadricornis	MNHN-ZM-AC-1909-150	Caliper	-	-	female	19282.1
137	Euarchontoglires	Rodentia	Castoridae	Castor_fiber	MNHN-1893-461	Caliper	-	-	male	19000
138	Euarchontoglires	Rodentia	Castoridae	Castor_canadensis	MNHN-1901-262	Caliper	-	-		18124.4
139	Laurasiatheria	Cetartiodactyla	Cervidae	Mazama_sp	MNHN-ZM-AC-1974-93	Caliper	-	-	male	17891.8	Body mass of genus average.
140	Laurasiatheria	Cetartiodactyla	Cervidae	Muntiacus_muntjak	MNHN-1856-62	Caliper	-	-		17611.6
141	Euarchontoglires	Primates	Cercopithecidae	Papio_sp	AMNH:Mamm:m-200689	Digital	ark:/87602/m4/M49138	AMNH Mammal Collections	male	16662.7	Body mass of genus average.
142	Laurasiatheria	Carnivora	Canidae	Cuon_alpinus	MNHN-1963-330	Caliper	-	-		15800
143	Laurasiatheria	Cetartiodactyla	Bovidae	Sylvicapra_grimmia	MNHN-1906-86	Caliper	-	-		15639.1
144	Euarchontoglires	Primates	Cercopithecidae	Mandrillus_leucophaeus	MNHN-1892-30	Caliper	-	-		14253.3
145	Euarchontoglires	Rodentia	Hystricidae	Hystrix_cristata	MNHN-ZM-AC-1933-35	Caliper	-	-		13406.3
146	Laurasiatheria	Cetartiodactyla	Moschidae	Moschus_moschiferus	MNHN-ZM-AC-1961-294	Caliper	-	-	male	13315.6
147	Laurasiatheria	Cetartiodactyla	Moschidae	Moschus_sp	MNHN-ZM-AC-VI-1402	Caliper	-	-		13297.2	Body mass of genus average.
148	Laurasiatheria	Carnivora	Viverridae	Arctictis_binturong	MNHN-ZM-AC-1975-78	Caliper	-	-	male	13000
149	Laurasiatheria	Carnivora	Mustelidae	Gulo_gulo	MNHN-ZM-MO-1995-1208	Caliper	-	-		12792.5
150	Laurasiatheria	Cetartiodactyla	Cervidae	Hydropotes_inermis	MNHN-ZM-AC-1948-87	Caliper	-	-	female	12760
151	Euarchontoglires	Primates	Cercopithecidae	Semnopithecus_entellus	MNHN-ZM-AC-1881-140	Caliper	-	-		12679.3
152	Euarchontoglires	Primates	Cercopithecidae	Nasalis_larvatus	MNHN-ZM-MO-1897-1301	Caliper	-	-	female	12265.6
153	Laurasiatheria	Carnivora	Viverridae	Civettictis_civetta	MNHN-ZM-AC-1890-3920	Caliper	-	-	male	12075.6
154	Laurasiatheria	Carnivora	Felidae	Leptailurus_serval	MNHN-1888-545	Caliper	-	-		12000
155	Laurasiatheria	Carnivora	Felidae	Caracal_caracal	MNHN-1883-1576	Caliper	-	-		11964.4
156	Laurasiatheria	Carnivora	Mustelidae	Meles_meles	MNHN-1976-333	Caliper	-	-		11884
157	Laurasiatheria	Carnivora	Felidae	Leopardus_pardalis	MNHN-1873-258	Caliper	-	-		11880
158	Laurasiatheria	Cetartiodactyla	Tragulidae	Hyemoschus_aquaticus	MNHN-1914-97	Caliper	-	-		10850
159	Laurasiatheria	Cetartiodactyla	Tragulidae	Hyemoschus_aquaticus	MNHN-1892-33	Caliper	-	-		10850
160	Euarchontoglires	Primates	Hylobatidae	Symphalangus_syndactylus	AMNH:Mamm:m-202326	Digital	ark:/87602/m4/M24484	AMNH Mammal Collections		10839
161	Laurasiatheria	Cetartiodactyla	Cervidae	Pudu_puda	MNHN-ZM-2017-1205	Caliper	-	-	male	9642.62
162	Laurasiatheria	Carnivora	Eupleridae	Cryptoprocta_ferox	MNHN-1963-248	Caliper	-	-		9500
163	Laurasiatheria	Carnivora	Viverridae	Viverra_zibetha	MNHN-ZM-AC-A12952	Caliper	-	-		9148.77
164	Euarchontoglires	Primates	Atelidae	Ateles_fusciceps	AMNH:Mamm:m-188141	Digital	ark:/87602/m4/M23454	AMNH Mammal Collections	female	9067.94
165	Laurasiatheria	Carnivora	Mustelidae	Mellivora_capensis	MNHN-2006-511	Caliper	-	-		8999.99
166	Euarchontoglires	Rodentia	Cuniculidae	Cuniculus_taczanowskii	FMNH:Mamm:70804	Digital	ark:/87602/m4/M141347	TEMPO Mammals		8999.95
167	Laurasiatheria	Carnivora	Mustelidae	Lutra_lutra	MNHN-1962-274	Caliper	-	-		8868.69
168	Euarchontoglires	Primates	Cercopithecidae	Colobus_polykomos	MNHN-ZM-MO-1961-1017	Caliper	-	-	male	8797.29
169	Euarchontoglires	Primates	Indriidae	Indri_indri	MNHN-A-3813	Caliper	-	-		8565.48
170	Laurasiatheria	Cetartiodactyla	Bovidae	Philantomba_maxwellii	MNHN-ZM-AC-1921-223	Caliper	-	-	Male	8557.69
171	Laurasiatheria	Carnivora	Mustelidae	Arctonyx_collaris	MNHN-1961-196	Caliper	-	-		8166.52
172	Laurasiatheria	Carnivora	Hyaenidae	Proteles_cristata	MNHN-ZM-AC-A3467	Caliper	-	-		8139.39
173	Euarchontoglires	Rodentia	Caviidae	Dolichotis_patagonum	MNHN-ZM-AC-1894-574	Caliper	-	-		8000
174	Euarchontoglires	Primates	Cercopithecidae	Erythrocebus_patas	MNHN-ZM-AC-1934-535	Caliper	-	-	female	7966.3
175	Laurasiatheria	Carnivora	Mustelidae	Taxidea_taxus	MNHN-ZM-AC-1895-417	Caliper	-	-		7842.15
176	Laurasiatheria	Carnivora	Felidae	Catopuma_temminckii	MNHN-1941-293	Caliper	-	-		7726.46
177	Euarchontoglires	Primates	Cercopithecidae	Trachypithecus_phayrei	MNHN-ZM-AC-1934-546	Caliper	-	-	male	7681.72
178	Euarchontoglires	Primates	Cercopithecidae	Cercocebus_atys	MNHN-ZM-AC-1933-309	Caliper	-	-	male	6941.24
179	Marsupialia	Diprotodontia	Macropodidae	Petrogale_penicillata	MNHN-1874-77	Caliper	-	-		6931.6
180	Euarchontoglires	Primates	Hylobatidae	Hoolock_leuconedys	AMNH:Mamm:m-201743	Digital	ark:/87602/m4/M49863	AMNH Mammal Collections	female	6699	Same as Bunopithecus hoolock in PanTHERIA.
181	Euarchontoglires	Primates	Atelidae	Ateles_belzebuth	AMNH:Mamm:m-188125	Digital	ark:/87602/m4/M26328	AMNH Mammal Collections	female	6692.42
182	Xenarthra	Pilosa	Megalonychidae	Choloepus_didactylus	MNHN-ZM-MO-1996-594	Caliper	-	-		6646.5
183	Laurasiatheria	Carnivora	Mustelidae	Lontra_longicaudis	MNHN-ZM-MO-1976-339	Caliper	-	-		6554.97
184	Marsupialia	Diprotodontia	Phascolarctidae	Phascolarctos_cinereus	MNHN-1879-60	Caliper	-	-		6528.74
185	Euarchontoglires	Primates	Cercopithecidae	Lophocebus_aterrimus	MNHN-ZM-AC-1935-61	Caliper	-	-	male	6510.37
186	Euarchontoglires	Primates	Cercopithecidae	Macaca_mulatta	UCD:31692	Digital	ark:/87602/m4/M63132	The rhesus macaque admixture project	female	6455.19
187	Euarchontoglires	Primates	Cercopithecidae	Macaca_mulatta	UCD:37477	Digital	ark:/87602/m4/M73328	The rhesus macaque admixture project	female	6455.19
188	Euarchontoglires	Primates	Cercopithecidae	Presbytis_sp	DU:EA:259	Digital	doi:10.17602/M2/M64272	Evolutionary Anthropology Department Specimens		6419.29	Body mass of genus average.
189	Euarchontoglires	Primates	Hylobatidae	Nomascus_concolor	MNHN-ZM-AC-1944-47	Caliper	-	-	female	6410.47
190	Euarchontoglires	Primates	Atelidae	Alouatta_seniculus	AMNH:Mamm:m-200550	Digital	ark:/87602/m4/M24485	AMNH Mammal Collections	female	6398.31
191	Laurasiatheria	Carnivora	Felidae	Lynx_rufus	MNHN-1895-50	Caliper	-	-		6374.47
192	Laurasiatheria	Carnivora	Procyonidae	Procyon_lotor	MNHN-ZM-AC-1910-252	Caliper	-	-	male	6373.72
193	Euarchontoglires	Rodentia	Echimyidae	Myocastor_coypus	MNHN-ZM-AC-1906-45	Caliper	-	-		6361.55
194	Laurasiatheria	Carnivora	Canidae	Speothos_venaticus	MNHN-2000-368	Caliper	-	-		6324.54
195	Euarchontoglires	Primates	Atelidae	Lagothrix_sp	AMNH:Mamm:m-202801	Digital	ark:/87602/m4/M24482	AMNH Mammal Collections		6263.69	L. lagotricha body mass.
196	Euarchontoglires	Primates	Atelidae	Lagothrix_sp	AMNH:Mamm:m-201386	Digital	ark:/87602/m4/M22689	AMNH Mammal Collections	male	6263.69	L. lagotricha body mass.
197	Euarchontoglires	Primates	Hylobatidae	Hylobates_sp	MNHN-ZM-AC-1880-1170	Caliper	-	-		5757.16	Body mass of genus average.
198	Laurasiatheria	Carnivora	Canidae	Cerdocyon_thous	MNHN-1973-289	Caliper	-	-		5741.66
199	Laurasiatheria	Carnivora	Canidae	Cerdocyon_thous	MNHN-1921-56	Caliper	-	-		5741.66
200	Euarchontoglires	Rodentia	Capromyidae	Capromys_pilorides	MNHN-ZM-AC-1869-407	Caliper	-	-		5200
201	Laurasiatheria	Carnivora	Ailuridae	Ailurus_fulgens	MNHN-1960-84	Caliper	-	-		5170.08
202	Euarchontoglires	Primates	Cercopithecidae	Cercopithecus_albogularis	MNHN-ZM-AC-1871-54	Caliper	-	-		5033.33		Makhasi, N. 2013 Morphological and genetic variation in samango monkeys (Cercopithecus albogularis) in southern Africa. Masters dissertation presented to the University of Fort Hare, South Africa. p.34
203	Xenarthra	Pilosa	Myrmecophagidae	Tamandua_tetradactyla	MNHN-ZM-AC-1917-219	Caliper	-	-		4800
204	Xenarthra	Cingulata	Chlamyphoridae	Euphractus_sexcinctus	UMMZ:Mamm:80276	Digital	doi:10.17602/M2/M64414	UMMZ - Division of Mammals; UMMZ-oVert Project; The oVert TCN		4731.16
205	Laurasiatheria	Pholidota	Manidae	Manis_pentadactyla	MNHN-1872-64	Caliper	-	-		4675
206	Laurasiatheria	Carnivora	Procyonidae	Nasua_narica	MNHN-ZM-AC-1888-846	Caliper	-	-		4578.43
207	Marsupialia	Diprotodontia	Macropodidae	Thylogale_stigmatica	UMZC:Vertebrates:a12. 44/1	Digital	ark:/87602/m4/M82466	TEMPO Mammals; Martín-Serra, A. and Benson, R.B. 2020. Developmental constraints do not influence long-term phenotypic evolution of marsupial forelimbs as revealed by interspecific disparity and integration patterns. The Am. Nat. 195(3): 547-560.		4511.47
208		Monotremata	Tachyglossidae	Tachyglossus_aculeatus	YPM:VZ:Mamm 014872	Digital	doi:10.17602/M2/M64577	Yale Peabody Museum Vertebrate Zoology; The oVert TCN		4499.97
209	Xenarthra	Pilosa	Bradypodidae	Bradypus_tridactylus	MNHN-1955-112	Caliper	-	-	female	4375.8
210	Xenarthra	Cingulata	Chlamyphoridae	Chaetophractus_villosus	MNHN-1884-911	Caliper	-	-		4372.8
211	Laurasiatheria	Carnivora	Viverridae	Paguma_larvata	MNHN-ZM-AC-1876-214	Caliper	-	-		4300
212	Laurasiatheria	Carnivora	Canidae	Nyctereutes_procyonoides	MNHN-1943-65	Caliper	-	-		4214.99
213	Xenarthra	Cingulata	Dasypodidae	Dasypus_sp	DU:EA:164	Digital	doi:10.17602/M2/M49221	Evolutionary Anthropology Department Specimens		4149.37	Body mass of genus average.
214	Laurasiatheria	Carnivora	Mustelidae	Eira_barbara	MNHN-1896-361	Caliper	-	-		4134.99
215	Euarchontoglires	Rodentia	Erethizontidae	Coendou_prehensilis	MNHN-ZM-AC-1959-119	Caliper	-	-	female	4116.2
216	Laurasiatheria	Carnivora	Canidae	Otocyon_megalotis	MNHN-1935-115	Caliper	-	-		4098.12
217	Marsupialia	Diprotodontia	Phalangeridae	Spilocuscus_maculatus	FMNH:Mamm:31752	Digital	ark:/87602/m4/M164405	TEMPO Mammals		4060.46
218	Euarchontoglires	Rodentia	Sciuridae	Marmota_marmota	MNHN-1919-60	Caliper	-	-	female	4059.15
219	Euarchontoglires	Primates	Cercopithecidae	Procolobus_verus	MNHN-1962-178	Caliper	-	-		3977.86
220	Euarchontoglires	Primates	Lemuridae	Varecia_variegata	AMNH:Mamm:m-201395	Digital	ark:/87602/m4/M22685	AMNH Mammal Collections	female	3849.99
221	Euarchontoglires	Primates	Lemuridae	Varecia_variegata	AMNH:Mamm:m-200578	Digital	ark:/87602/m4/M24491	AMNH Mammal Collections	male	3849.99
222	Laurasiatheria	Carnivora	Canidae	Urocyon_cinereoargenteus	MNHN-1865-202	Caliper	-	-		3833.71
223	Euarchontoglires	Primates	Cercopithecidae	Chlorocebus_pygerythrus	MNHN-ZM-AC-1894-544	Caliper	-	-		3695.99	Chlorocebus aethiops body mass.
224	Laurasiatheria	Carnivora	Herpestidae	Ichneumia_albicauda	MNHN-ZM-MO-1939-185	Caliper	-	-		3628.4
225	Laurasiatheria	Carnivora	Herpestidae	Ichneumia_albicauda	MNHN-ZM-MO-1918-17B	Caliper	-	-		3628.4
226	Laurasiatheria	Carnivora	Herpestidae	Atilax_paludinosus	MNHN-ZM-AC-1902-37	Caliper	-	-	female	3600.16
227	Euarchontoglires	Primates	Indriidae	Propithecus_verreauxi	MNHN-ZM-AC-1939-330	Caliper	-	-	male	3588.26
228	Laurasiatheria	Carnivora	Canidae	Vulpes_lagopus	MNHN-1909-380	Caliper	-	-		3584.37
229	Laurasiatheria	Cetartiodactyla	Tragulidae	Tragulus_sp	MNHN-1880-1000	Caliper	-	-		3581.8	Body mass of genus average.
230	Euarchontoglires	Primates	Pitheciidae	Cacajao_calvus	MNHN-ZM-AC1884-319	Caliper	-	-	female	3421.04
231	Laurasiatheria	Carnivora	Mephitidae	Conepatus_chinga	MNHN-ZM-AC-1897-431	Caliper	-	-		3400		Afflerbaugh, K. 2002. "Conepatus chinga" (On-line), Animal Diversity Web. Accessed February 17, 2022 at https://animaldiversity.org/accounts/Conepatus_chinga/
232	Marsupialia	Dasyuromorpha	Dasyuridae	Dasyurus_maculatus	UMZC:Vertebrates:a6. 10/3	Digital	ark:/87602/m4/M68239	TEMPO Mammals; Martín-Serra, A. and Benson, R.B. 2020. Developmental constraints do not influence long-term phenotypic evolution of marsupial forelimbs as revealed by interspecific disparity and integration patterns. The Am. Nat. 195(3): 547-560.		3284.15
233	Marsupialia	Dasyuromorpha	Dasyuridae	Dasyurus_maculatus	MVZ:Mamm:126999	Digital	ark:/87602/m4/M98700	MVZ Project; The oVert TCN		3284.15
234	Laurasiatheria	Carnivora	Viverridae	Chrotogale_owstoni	MVZ:Mamm:186572	Digital	ark:/87602/m4/M85286	MVZ Project; The oVert TCN		3267.71
235	Euarchontoglires	Rodentia	Thryonomyidae	Thryonomys_sp	YPM:VZ:Mamm 014532	Digital	ark:/87602/m4/M95042	Yale Peabody Museum Vertebrate Zoology; The oVert TCN		3228.99	Body mass of genus average.
236	Laurasiatheria	Carnivora	Viverridae	Paradoxurus_hermaphroditus	MNHN-ZM-AC-1894-159	Caliper	-	-		3200
237	Laurasiatheria	Cetartiodactyla	Tragulidae	Moschiola_meminna	MNHN-1925-15	Caliper	-	-		3130.95
238	Afrotheria	Hyracoidea	Procavidae	Dendrohyrax_arboreus	MNHN-ZM-MO-1977-255	Caliper	-	-	female	2981.11
239	Afrotheria	Hyracoidea	Procavidae	Dendrohyrax_arboreus	MNHN-ZM-MO-1977-258	Caliper	-	-	female	2981.11
240	Laurasiatheria	Carnivora	Herpestidae	Herpestes_ichneumon	MNHN-1882-49	Caliper	-	-		2980.02
241	Euarchontoglires	Primates	Pitheciidae	Chiropotes_sp	SBU:Blue Pin	Digital	ark:/87602/m4/M53814	Stony Brook Anatomy Collection; The oVert TCN		2967.27	C. satanas body mass.
242	Afrotheria	Hyracoidea	Procavidae	Procavia_capensis	MNHN-1934-95	Caliper	-	-		2952.48
243	Laurasiatheria	Carnivora	Viverridae	Viverricula_indica	MNHN-ZM-AC-1895-209	Caliper	-	-		2918.88
244	Euarchontoglires	Rodentia	Dasyproctidae	Dasyprocta_prymnolopha	MNHN-1934-599	Caliper	-	-		2900
245	Laurasiatheria	Carnivora	Felidae	Felis_catus	MNHN-squelette monté	Caliper	-	-		2884.8
246	Laurasiatheria	Carnivora	Felidae	Pardofelis_marmorata	MNHN-ZM-AC-A3424	Caliper	-	-		2826.68
247	Marsupialia	Diprotodontia	Potoroidae	Aepyprymnus_rufescens	MSU:MR:MR.4680	Digital	ark:/87602/m4/M112448	MSU-oVert Project; The oVert TCN		2810.31
248	Laurasiatheria	Carnivora	Felidae	Prionailurus_bengalensis	MNHN-1883-1588	Caliper	-	-		2780.97
249	Laurasiatheria	Carnivora	Eupleridae	Eupleres_goudotii	MNHN-ZM-MO-1962-2105	Caliper	-	-		2763.34
250	Euarchontoglires	Primates	Cebidae	Sapajus_apella	MNHN-ZM-AC-1880-1380	Caliper	-	-	female	2758.38	Same as Cebus apella in PanTHERIA (old taxonomy).
251	Euarchontoglires	Primates	Daubentoniidae	Daubentonia_madagascariensis	DLC:6454f	Digital	doi:10.17602/M2/M32055	Duke Lemur Center Cadaveric Specimens	female	2731.37
252	Euarchontoglires	Primates	Daubentoniidae	Daubentonia_madagascariensis	DLC:6941m	Digital	doi:10.17602/M2/M24659	Duke Lemur Center Cadaveric Specimens	male	2731.37
253	Marsupialia	Diprotodontia	Phalangeridae	Trichosurus_vulpecula	YPM:VZ:Mamm 005643	Digital	ark:/87602/m4/M68288	Yale Peabody Museum Vertebrate Zoology; The oVert TCN	male	2685.39
254	Euarchontoglires	Primates	Lemuridae	Lemur_catta	DLC:7142f	Digital	doi:10.17602/M2/M32220	Duke Lemur Center Cadaveric Specimens		2626.48
255	Laurasiatheria	Carnivora	Mustelidae	Galictis_vittata	MNHN-ZM-AC-1878-515	Caliper	-	-		2600		Gregg, M. 2013. "Galictis vittata" (On-line), Animal Diversity Web. Accessed February 17, 2022 at https://animaldiversity.org/accounts/Galictis_vittata/
256	Euarchontoglires	Primates	Cebidae	Cebus_albifrons	MNHN-ZM-AC-1896-467	Caliper	-	-	male	2509.68
257	Laurasiatheria	Carnivora	Mephitidae	Mydaus_javanensis	UMZC:Vertebrates:k.1802	Digital	ark:/87602/m4/M164558	TEMPO Mammals		2500
258	Marsupialia	Diprotodontia	Phalangeridae	Phalanger_orientalis	NHMUK:1867.4.12.413	Digital	ark:/87602/m4/M160191	TEMPO Mammals		2487.5
259	Afrotheria	Hyracoidea	Procavidae	Heterohyrax_brucei	MNHN-1934-92	Caliper	-	-		2453.66
260	Afrotheria	Hyracoidea	Procavidae	Heterohyrax_brucei	MNHN-1934-94	Caliper	-	-		2453.66
261	Laurasiatheria	Carnivora	Procyonidae	Potos_flavus	MNHN-ZM-AC-1889-109	Caliper	-	-	female	2441.81
262	Laurasiatheria	Carnivora	Mephitidae	Mephitis_mephitis	MVZ:Mamm:126784	Digital	ark:/87602/m4/M98696	MVZ Project; The oVert TCN		2399.99
263	Laurasiatheria	Carnivora	Viverridae	Arctogalidia_trivirgata	MNHN-ZM-MO-2001-495	Caliper	-	-	male	2323.79
264	Euarchontoglires	Rodentia	Dasyproctidae	Dasyprocta_punctata	FMNH:Mamm:60569	Digital	ark:/87602/m4/M141358	TEMPO Mammals		2309.12
265	Euarchontoglires	Lagomorpha	Leporidae	Pronolagus_rupestris	FMNH:Mamm:177246	Digital	ark:/87602/m4/M157945	TEMPO Mammals		2249.99
266	Laurasiatheria	Carnivora	Nandiniidae	Nandinia_binotata	MNHN-ZM-AC-1896-482	Caliper	-	-	male	2167.2
267	Euarchontoglires	Rodentia	Hystricidae	Atherurus_macrourus	MVZ:Mamm:186560	Digital	ark:/87602/m4/M99369	MVZ Project; The oVert TCN		2000
268	Laurasiatheria	Cetartiodactyla	Tragulidae	Tragulus_javanicus	MNHN-1976-392	Caliper	-	-		1889.93
269	Laurasiatheria	Carnivora	Eupleridae	Fossa_fossana	MNHN-ZM-MO-1882-1586	Caliper	-	-	male	1853.98
270	Euarchontoglires	Rodentia	Chinchillidae	Lagidium_sp	MNHN-1871-163	Caliper	-	-		1814	Body mass of genus average.
271	Laurasiatheria	Carnivora	Viverridae	Genetta_genetta	MNHN-ZM-AC-1886-30	Caliper	-	-		1756.17
272	Euarchontoglires	Rodentia	Hystricidae	Trichys_fasciculata	UMZC:Vertebrates:e.3496	Digital	ark:/87602/m4/M164559	TEMPO Mammals		1750
273	Euarchontoglires	Primates	Lemuridae	Eulemur_coronatus	DLC:6177f	Digital	doi:10.17602/M2/M31062	Duke Lemur Center Cadaveric Specimens		1699.85
274	Laurasiatheria	Carnivora	Mustelidae	Martes_foina	MNHN-ZM-MO-1992-2030	Caliper	-	-	male	1675
275	Marsupialia	Diprotodontia	Potoroidae	Bettongia_gaimardi	MNHN-1883-1517	Caliper	-	-		1667.55
276	Euarchontoglires	Primates	Pitheciidae	Pithecia_pithecia	SBU:White Pin	Digital	ark:/87602/m4/M55604	Stony Brook Anatomy Collection; The oVert TCN	Suriname	1667.19
277	Euarchontoglires	Lagomorpha	Leporidae	Oryctolagus_cuniculus	MNHN-1985-1836	Caliper	-	-		1590.57
278	Euarchontoglires	Rodentia	Cuniculidae	Cuniculus_paca	MNHN-1889-138	Caliper	-	-		1590.57
279	Laurasiatheria	Pholidota	Manidae	Phataginus_triscupis	MNHN-1972-173	Caliper	-	-		1539.31
280	Euarchontoglires	Rodentia	Sciuridae	Petaurista_petaurista	MNHN-ZM-AC-1958-102	Caliper	-	-	male	1533.84
281	Xenarthra	Cingulata	Chlamyphoridae	Cabassous_chacoensis	UF:Mamm:20650	Digital	ark:/87602/m4/M40499	UF-Mammalogy Collections	male	1490.01
282		Monotremata	Ornithorhynchidae	Ornithorhynchus_anatinus	MVZ:Mamm:32885	Digital	ark:/87602/m4/M65299	MVZ Project; The oVert TCN	male	1484.25
283		Monotremata	Ornithorhynchidae	Ornithorhynchus_anatinus	UMZC:Vertebrates:a2. 2/10	Digital	ark:/87602/m4/M141006	TEMPO Mammals		1484.25
284	Marsupialia	Didelphimorphia	Didelphidae	Didelphis_sp	DU:EA:204	Digital	doi:10.17602/M2/M29046	Evolutionary Anthropology Department Specimens		1428.3	Body mass of genus average.
285	Xenarthra	Cingulata	Chlamyphoridae	Tolypeutes_matacus	UMMZ:Mamm:125621	Digital	doi:10.17602/M2/M64401	UMMZ - Division of Mammals; UMMZ-oVert Project; The oVert TCN		1303.47
286	Euarchontoglires	Rodentia	Nesomyidae	Cricetomys_gambianus	NHMUK:ZD:1890.3.27.2	Digital	ark:/87602/m4/M155027	TEMPO Mammals		1267.52
287	Laurasiatheria	Carnivora	Herpestidae	Mungos_mungo	MNHN-ZM-AC-1894-414	Caliper	-	-		1260
288	Marsupialia	Diprotodontia	Pseudocheiridae	Petauroides_volans	NHMUK:zoo:1926.3.11.225	Digital	ark:/87602/m4/M52207	TEMPO Mammals; Martín-Serra, A. and Benson, R.B. 2020. Developmental constraints do not influence long-term phenotypic evolution of marsupial forelimbs as revealed by interspecific disparity and integration patterns. The Am. Nat. 195(3): 547-560.		1257.17
289	Euarchontoglires	Primates	Cercopithecidae	Miopithecus_talapoin	MNHN-ZM-AC-A3863	Caliper	-	-	female	1248.86
290	Marsupialia	Peramelemorphia	Thylacomyidae	Macrotis_lagotis	MNHN-ZM-AC-1872-172	Caliper	-	-	female	1229.58
291	Marsupialia	Peramelemorphia	Thylacomyidae	Macrotis_lagotis	MNHN-1872-309	Caliper	-	-		1229.58
292	Euarchontoglires	Rodentia	Nesomyidae	Hypogeomys_antimena	FMNH:Mamm:151994	Digital	ark:/87602/m4/M159947	TEMPO Mammals		1175.93
293	Euarchontoglires	Primates	Indriidae	Avahi_laniger	AMNH:Mamm:m-170451	Digital	ark:/87602/m4/M20898	AMNH Mammal Collections		1092.28
294	Euarchontoglires	Primates	Lorisidae	Perodicticus_potto	YPM:VZ:Mamm 014912	Digital	ark:/87602/m4/M48709	Yale Peabody Museum Vertebrate Zoology; The oVert TCN		1081.81
295	Euarchontoglires	Rodentia	Sciuridae	Ratufa_indica	MNHN-ZM-AC-1966-65	Caliper	-	-		1060
296	Marsupialia	Diprotodontia	Potoroidae	Potorous_tridactylus	FMNH:Mamm:57805	Digital	ark:/87602/m4/M68179	TEMPO Mammals; Martín-Serra, A. and Benson, R.B. 2020. Developmental constraints do not influence long-term phenotypic evolution of marsupial forelimbs as revealed by interspecific disparity and integration patterns. The Am. Nat. 195(3): 547-560.		1054.67
297	Laurasiatheria	Carnivora	Procyonidae	Bassariscus_astutus	MNHN-ZM-AC-1854-128	Caliper	-	-	male	1010.37
298	Marsupialia	Diprotodontia	Pseudocheiridae	Hemibelideus_lemuroides	MSU:MR:MR.4678	Digital	ark:/87602/m4/M86530	MSU-oVert Project; The oVert TCN		993.59
299	Marsupialia	Didelphimorphia	Didelphidae	Chironectes_minimus	UMMZ:Mamm:155686	Digital	ark:/87602/m4/M75118	UMMZ - Division of Mammals; UMMZ-oVert Project; The oVert TCN	male	974.33
300	Euarchontoglires	Rodentia	Dasyproctidae	Myoprocta_acouchy	MNHN-1924-357	Caliper	-	-		954.87
301	Laurasiatheria	Carnivora	Mustelidae	Melogale_moschata	MNHN-ZM-AC-1892-1015	Caliper	-	-	female	938.5
302	Euarchontoglires	Primates	Lorisidae	Nycticebus_coucang	DU:EA:193	Digital	doi:10.17602/M2/M28832	Evolutionary Anthropology Department Specimens		924.55
303	Euarchontoglires	Primates	Lemuridae	Hapalemur_griseus	DLC:1302f	Digital	doi:10.17602/M2/M15955	Duke Lemur Center Cadaveric Specimens	female	916
304	Euarchontoglires	Primates	Cebidae	Aotus_trivirgatus	MNHN-ZM-AC-1935-114	Caliper	-	-	male	912.4
305	Marsupialia	Diprotodontia	Pseudocheiridae	Pseudocheirus_peregrinus	YPM:VZ:Mamm 014395	Digital	ark:/87602/m4/M91603	Yale Peabody Museum Vertebrate Zoology; The oVert TCN		895.22
306	Afrotheria	Afrosoricida	Tenrecidae	Tenrec_ecaudatus	YPM:VZ:Mamm 006029	Digital	ark:/87602/m4/M65199	The oVert TCN		887.59
307	Afrotheria	Afrosoricida	Tenrecidae	Tenrec_ecaudatus	UMMZ:Mamm:138441	Digital	ark:/87602/m4/M141220	TEMPO Mammals		887.59
308	Marsupialia	Peramelemorphia	Peramelidae	Echymipera_kalubu	MVZ:Mamm:138479	Digital	ark:/87602/m4/M85264	MVZ Project; The oVert TCN		825.16
309	Marsupialia	Peramelemorphia	Peramelidae	Isoodon_obesulus	UMZC:Vertebrates:a7. 4/5	Digital	ark:/87602/m4/M82439	TEMPO Mammals; Martín-Serra, A. and Benson, R.B. 2020. Developmental constraints do not influence long-term phenotypic evolution of marsupial forelimbs as revealed by interspecific disparity and integration patterns. The Am. Nat. 195(3): 547-560.		824.76
310	Marsupialia	Peramelemorphia	Peramelidae	Isoodon_obesulus	MVZ:Mamm:132249	Digital	ark:/87602/m4/M99361	MVZ Project; The oVert TCN		824.76
311	Euarchontoglires	Primates	Galagidae	Otolemur_garnetti	DLC:NN_Og01	Digital	doi:10.17602/M2/M15702	Duke Lemur Center Cadaveric Specimens	male	811.17
312	Laurasiatheria	Carnivora	Mustelidae	Ictonyx_striatus	MNHN-ZM-AC-A3402	Caliper	-	-		811.02
313	Laurasiatheria	Carnivora	Eupleridae	Galidia_elegans	MNHN-ZM-MO-1992-1684	Caliper	-	-	female	810
314	Euarchontoglires	Rodentia	Caviidae	Kerodon_rupestris	MNHN-ZM-MO-1982-646	Caliper	-	-	male	799.15
315	Euarchontoglires	Rodentia	Sciuridae	Cynomys_ludovicianus	MNHN-ZM-AC-1895-4	Caliper		-	female	797.05
316	Euarchontoglires	Rodentia	Anomaluridae	Anomalurus_sp	YPM:VZ:Mamm 014526	Digital	ark:/87602/m4/M95047	Yale Peabody Museum Vertebrate Zoology; The oVert TCN		791.225	Body mass of genus average.
317	Laurasiatheria	Eulipotyphla	Erinaceidae	Erinaceus_europaeus	UMMZ:Mamm:138469	Digital	doi:10.17602/M2/M63737	UMMZ - Division of Mammals; UMMZ-oVert Project; The oVert TCN	male	777.95
318	Euarchontoglires	Rodentia	Bathyergidae	Bathyergus_suillus	MNHN-A3351	Caliper	-	-		777.38
319	Euarchontoglires	Primates	Cebidae	Saimiri_sciureus	MCZ:Mamm:4245	Digital	ark:/87602/m4/M73027	MCZ-oVert	male	749.47
320	Laurasiatheria	Carnivora	Herpestidae	Suricata_suricatta	MNHN-A3439	Caliper	-	-	male	729.99
321	Euarchontoglires	Lagomorpha	Leporidae	Sylvilagus_bachmani	UMMZ:Mamm:93557	Digital	ark:/87602/m4/M164470	TEMPO Mammals		714.53
322	Laurasiatheria	Carnivora	Eupleridae	Salanoia_concolor	MNHN-ZM-MO-1961-974	Caliper	-	-	male	711.49
323	Laurasiatheria	Carnivora	Herpestidae	Cynictis_penicillata	MNHN-ZM-AC-A3451	Caliper	-	-		694.41
324	Afrotheria	Afrosoricida	Potamogalidae	Potamogale_velox	YPM:VZ:Mamm 014396	Digital	ark:/87602/m4/M64570	The oVert TCN		670.99
325	Afrotheria	Afrosoricida	Potamogalidae	Potamogale_velox	UMCZ:vertebrates:e.5425.f	Digital	ark:/87602/m4/M140882	TEMPO Mammals		670.99
326	Euarchontoglires	Primates	Lepilemuridae	Lepilemur_mustelinus	AMNH:Mamm:m-170790	Digital	ark:/87602/m4/M24493	AMNH Mammal Collections	male	669.03
327	Laurasiatheria	Carnivora	Eupleridae	Mungotictis_decemlineata	MNHN-ZM-MO-1992-1670	Caliper	-	-		657.03
328	Euarchontoglires	Rodentia	Muridae	Hydromys_chrysogaster	MVZ:Mamm:175330	Digital	ark:/87602/m4/M99366	MVZ Project; The oVert TCN		626.17
329	Euarchontoglires	Primates	Cebidae	Leontopithecus_rosalia	AMNH:Mamm:m-235274	Digital	ark:/87602/m4/M27304	AMNH Mammal Collections	male	592.52
330	Laurasiatheria	Carnivora	Viverridae	Poiana_richardsonii	YPM:VZ:Mamm 014715	Digital	ark:/87602/m4/M95043	Yale Peabody Museum Vertebrate Zoology; The oVert TCN		570.08
331	Euarchontoglires	Primates	Cebidae	Callimico_goeldii	AMNH:Mamm:m-183285	Digital	ark:/87602/m4/M25372	AMNH Mammal Collections	male	558
332	Marsupialia	Didelphimorphia	Didelphidae	Lutreolina_crassicaudata	UMMZ:Mamm:134562	Digital	doi:10.17602/M2/M82375	UMMZ - Division of Mammals; TEMPO Mammals; Martín-Serra, A. and Benson, R.B. 2020. Developmental constraints do not influence long-term phenotypic evolution of marsupial forelimbs as revealed by interspecific disparity and integration patterns. The Am. Nat. 195(3): 547-560.		554.77
333	Laurasiatheria	Carnivora	Eupleridae	Galidictis_fasciata	MNHN-ZM-MO-1882-1615	Caliper	-	-	male	549.99
334	Euarchontoglires	Primates	Cebidae	Saguinus_sp	DU:EA:203	Digital	doi:10.17602/M2/M49203	Evolutionary Anthropology Department Specimens		493.42	Body mass of genus average.
335	Euarchontoglires	Rodentia	Chinchillidae	Chinchilla_lanigera	UMMZ:Mamm:93493	Digital		TEMPO Mammals		480.28
336	Euarchontoglires	Rodentia	Anomaluridae	Anomalurus_beecrofti	NHMUK:zoo:zd 1989.174	Digital	ark:/87602/m4/M52927	TEMPO Mammals		479.07
337	Laurasiatheria	Carnivora	Mephitidae	Spilogale_gracilis	UMMZ:Mamm:103458	Digital	-	-	male	465.745	Body mass of genus average.
338	Euarchontoglires	Rodentia	Echimyidae	Isothrix_bistriata	MVZ:Mamm:191300	Digital	ark:/87602/m4/M85288	MVZ Project; The oVert TCN		444.99
339	Euarchontoglires	Rodentia	Cricetidae	Cricetus_cricetus	UMMZ:Mamm:108463	Digital	ark:/87602/m4/M64394	UMMZ - Division of Mammals; UMMZ-oVert; The oVert TCN	male	428.95
340	Afrotheria	Macroscelidea	Macroscelididae	Rhynchocyon_petersi	NHMUK:zoo:1886.9.21.1	Digital	ark:/87602/m4/M157403	TEMPO Mammals		423.99
341	Marsupialia	Diprotodontia	Petauridae	Dactylopsila_trivirgata	NHMUK:1897.8.7.79	Digital	ark:/87602/m4/M68263	TEMPO Mammals; Martín-Serra, A. and Benson, R.B. 2020. Developmental constraints do not influence long-term phenotypic evolution of marsupial forelimbs as revealed by interspecific disparity and integration patterns. The Am. Nat. 195(3): 547-560.		413.41
342	Euarchontoglires	Rodentia	Caviidae	Galea_musteloides	UMMZ:Mamm:134539	Digital	ark:/87602/m4/M68599	UMMZ-oVert; The oVert TCN	female	386.64
343	Euarchontoglires	Rodentia	Diatomyidae	Laonastes_aenigmamus	NHMUK:zoo:zd 1999.74	Digital	ark:/87602/m4/M155040	TEMPO Mammals		374		Jenkins, P.D.; Kilpatrick, C.W.; Robinson, M.F. et al. 2005. Morphological and molecular investigations of a new family, genus and species of rodent (Mammalia: Rodentia: Hystricognatha) from Lao PDR. System. Biodivers. 2(4): 419-454.
344	Euarchontoglires	Rodentia	Cricetidae	Hodomys_alleni	UMMZ:Mamm:113820	Digital	ark:/87602/m4/M68576	UMMZ - Division of Mammals; UMMZ-oVert; The oVert TCN	male	367.59
345	Marsupialia	Didelphimorphia	Didelphidae	Metachirus_nudicaudatus	UMMZ:Mamm:155687	Digital	doi:10.17602/M2/M68600	UMMZ - Division of Mammals; UMMZ-oVert Project; The oVert TCN	male	363.77
346	Marsupialia	Didelphimorphia	Didelphidae	Metachirus_nudicaudatus	UMMZ:Mamm:117229	Digital	ark:/87602/m4/M64397	UMMZ - Division of Mammals; UMMZ-oVert Project; The oVert TCN	male	363.77
347	Euarchontoglires	Rodentia	Muridae	Sundamys_muelleri	UMMZ:Mamm:174437	Digital	ark:/87602/m4/M68616	UMMZ - Division of Mammals; UMMZ-oVert; The oVert TCN	female	356.48
348	Euarchontoglires	Rodentia	Echimyidae	Proechimys_semispinosus	UMMZ:Mamm:115393	Digital	ark:/87602/m4/M82215	UMMZ - Division of Mammals; UMMZ-oVert; The oVert TCN	female	353.32
349	Euarchontoglires	Rodentia	Sciuridae	Spermophilus_sp	DU:EA:166	Digital	doi:10.17602/M2/M27306	Evolutionary Anthropology Department Specimens		353.187	Body mass of genus average.
350	Euarchontoglires	Rodentia	Muridae	Leopoldamys_sabanus	UMMZ:Mamm:174506	Digital	ark:/87602/m4/M68617	UMMZ - Division of Mammals; UMMZ-oVert; The oVert TCN	female	347.61
351	Euarchontoglires	Primates	Cebidae	Callithrix_sp	DU:EA:197	Digital	doi:10.17602/M2/M28929	Evolutionary Anthropology Department Specimens		345.224	Body mass of genus average.
352	Euarchontoglires	Primates	Lorisidae	Nycticebus_pygmaeus	DLC:2901f	Digital	doi:10.17602/M2/M14935	Duke Lemur Center Cadaveric Specimens	female	342.32
353	Euarchontoglires	Rodentia	Sciuridae	Sciurus_vulgaris	UMMZ:Mamm:80280	Digital	doi:10.17602/M2/M97682	UMMZ - Division of Mammals; UMMZ-oVert; The oVert TCN	female	333
354	Euarchontoglires	Rodentia	Sciuridae	Heliosciurus_rufobrachium	YPM:VZ:Mamm 014455	Digital	ark:/87602/m4/M95040	Yale Peabody Museum Vertebrate Zoology; The oVert TCN		332.88
355	Marsupialia	Didelphimorphia	Didelphidae	Caluromys_derbianus	UMMZ:Mamm:114856	Digital	doi:10.17602/M2/M82350	UMMZ - Division of Mammals; TEMPO Mammals; Martín-Serra, A. and Benson, R.B. 2020. Developmental constraints do not influence long-term phenotypic evolution of marsupial forelimbs as revealed by interspecific disparity and integration patterns. The Am. Nat. 195(3): 547-560.		326.72	Body mass of genus average.
356	Euarchontoglires	Rodentia	Muridae	Paruromys_dominator	MVZ:Mamm:225789	Digital	ark:/87602/m4/M85291	MVZ Project; The oVert TCN		325.31
357	Laurasiatheria	Eulipotyphla	Erinaceidae	Hemiechinus_auritus	UMMZ:Mamm:101315	Digital	doi:10.17602/M2/M64391	UMMZ - Division of Mammals; UMMZ-oVert Project; The oVert TCN		322.04
358	Euarchontoglires	Rodentia	Echimyidae	Proechimys_guyannensis	NHMUK:79.322	Digital	ark:/87602/m4/M154965	TEMPO Mammals		314.03
359	Marsupialia	Didelphimorphia	Didelphidae	Caluromys_sp	DU:EA:181	Digital	doi:10.17602/M2/M28455	Evolutionary Anthropology Department Specimens		307.84
360	Euarchontoglires	Primates	Galagidae	Euoticus_elegantulus	AMNH:Mamm:m-269906	Digital	ark:/87602/m4/M16449	AMNH Mammal Collections	male	295.48
361	Euarchontoglires	Primates	Cebidae	Callithrix_jacchus	MNHN-ZM-AC-1912-453	Caliper	-	-		290.21
362	Laurasiatheria	Carnivora	Mustelidae	Mustela_erminea	UMMZ:Mamm:175894	Digital	doi:10.17602/M2/M57242	UMMZ - Division of Mammals; UMMZ-oVert Project	female	284.5
363	Euarchontoglires	Rodentia	Muridae	Rattus_norvegicus	UMMZ:Mamm:167022	Digital	doi:10.17602/M2/M82216	UMMZ - Division of Mammals; UMMZ-oVert; The oVert TCN	female	282.89
364	Euarchontoglires	Rodentia	Caviidae	Cavia_fulgida	UMZC:vertebrates:e.3705	Digital	ark:/87602/m4/M140710	TEMPO Mammals		282.5
365	Euarchontoglires	Primates	Galagidae	Sciurocheirus_alleni	AMNH:Mamm:m-201448	Digital	ark:/87602/m4/M20544	AMNH Mammal Collections		266.03	Same as Galago alleni in PanTHERIA.
366	Euarchontoglires	Rodentia	Cricetidae	Neofiber_alleni	UF:Mammal:13931	Digital	ark:/87602/m4/M140579	ABAC/oVert Whole Rodent skeleton microCT; UF-Mammalogy collections; The oVert TCN		265.38
367	Xenarthra	Pilosa	Cyclopedidae	Cyclopes_didactylus	UMMZ:Mamm:99169	Digital	ark:/87602/m4/M64415	UMMZ - Division of Mammals; UMMZ-oVert Project; The oVert TCN		263.95
368	Xenarthra	Pilosa	Cyclopedidae	Cyclopes_didactylus	UMZC:Vertebrates:e.621	Digital	ark:/87602/m4/M140748	TEMPO Mammals		263.95
369	Euarchontoglires	Primates	Lorisidae	Arctocebus_calabarensis	YPM:VZ:Mamm 014402	Digital	ark:/87602/m4/M50832	Yale Peabody Museum Vertebrate Zoology; The oVert TCN		258.01
370	Marsupialia	Didelphimorphia	Didelphidae	Caluromysiops_irrupta	FMNH:Mamm:60698	Digital	ark:/87602/m4/M82280	TEMPO Mammals; Martín-Serra, A. and Benson, R.B. 2020. Developmental constraints do not influence long-term phenotypic evolution of marsupial forelimbs as revealed by interspecific disparity and integration patterns. The Am. Nat. 195(3): 547-560.		257.48
371	Euarchontoglires	Primates	Lorisidae	Loris_tardigradus	DLC:2930m	Digital	doi:10.17602/M2/M16454	Duke Lemur Center Cadaveric Specimens	male	249.22
372	Euarchontoglires	Primates	Lorisidae	Arctocebus_aureus	YPM:VZ:Mamm 014401	Digital	ark:/87602/m4/M57009	Yale Peabody Museum Vertebrate Zoology; The oVert TCN		234.16
373	Euarchontoglires	Rodentia	Ctenodactylidae	Ctenodactylus_sp	AMNH:Mamm:m-239586	Digital	ark:/87602/m4/M101290	AMNH-oVert Project; AMNH Mammaloly; The oVert TCN		231.005	Body mass of genus average.
374	Euarchontoglires	Rodentia	Spalacidae	Tachyoryctes_splendens	MVZ:Mamm:183905	Digital	ark:/87602/m4/M98048	MVZ Project; The oVert TCN		227.13
375	Laurasiatheria	Carnivora	Mustelidae	Lyncodon_patagonicus	MNHN-1897-570	Caliper	-	-		225
376	Euarchontoglires	Lagomorpha	Leporidae	Lepus_sp	MNHN-1902-809	Caliper	-	-		224.34	Body mass of genus average.
377	Euarchontoglires	Rodentia	Sciuridae	Funisciurus_anerythrus	YPM:VZ:Mamm 014449	Digital	ark:/87602/m4/M91244	Yale Peabody Museum Vertebrate Zoology; The oVert TCN		223.54
378	Euarchontoglires	Rodentia	Sciuridae	Paraxerus_cepapi	MVZ:Mamm:120841	Digital	ark:/87602/m4/M84951	MVZ Project; The oVert TCN	male	222.85
379	Marsupialia	Peramelemorphia	Chaeropodidae	Chaeropus_castanotis	UMZC:Vertebrates:a7. 19/1	Digital	ark:/87602/m4/M164560	TEMPO Mammals		219.51
380	Euarchontoglires	Primates	Galagidae	Galago_senegalensis	DU:EA:195	Digital	doi:10.17602/M2/M28595	Evolutionary Anthropology Department Specimens		215.2
381	Euarchontoglires	Rodentia	Ctenomyidae	Ctenomys_maulinus	UF:Mammal:15021	Digital	ark:/87602/m4/M140433	ABAC/oVert Whole Rodent skeleton microCT; UF-Mammalogy collections; The oVert TCN		215
382	Euarchontoglires	Rodentia	Cricetidae	Neotoma_mexicana	UMMZ:Mamm:113819	Digital	ark:/87602/m4/M57194	UMMZ - Division of Mammals; UMMZ-oVert; The oVert TCN	female	203
383	Euarchontoglires	Rodentia	Geomyidae	Geomys_pinetis	UF:Mammal:10349	Digital	ark:/87602/m4/M140446	ABAC/oVert Whole Rodent skeleton microCT; UF-Mammalogy collections; The oVert TCN		201.15
384	Afrotheria	Macroscelidea	Macroscelididae	Petrodromus_tetradactylus	CAS:mam:28177	Digital	ark:/87602/m4/M83183	CAS-oVert; The oVert TCN	male	201
385	Euarchontoglires	Rodentia	Nesomyidae	Brachytarsomys_albicauda	MVZ:Mamm:223935	Digital	ark:/87602/m4/M85290	MVZ Project; The oVert TCN		200
386	Euarchontoglires	Rodentia	Sciuridae	Dremomys_pernyi	MVZ:Mamm:180961	Digital	ark:/87602/m4/M85281	MVZ Project; The oVert TCN		198.63
387	Euarchontoglires	Primates	Cheirogaleidae	Cheirogaleus_medius	DLC:1653f	Digital	doi:10.17602/M2/M26259	Duke Lemur Center Cadaveric Specimens	female	196.76
388	Euarchontoglires	Rodentia	Ctenodactylidae	Massoutiera_mzabi	MNHN-ZM-AC-1936-21	Caliper	-	-		194
389	Euarchontoglires	Rodentia	Abrocomidae	Abrocoma_cinerea	UMMZ:Mamm:120621	Digital	ark:/87602/m4/M141118	UMMZ - Division of Mammals; TEMPO Mammals		193.64
390	Euarchontoglires	Rodentia	Muridae	Rhombomys_opimus	UMMZ:Mamm:108460	Digital	ark:/87602/m4/M68559	UMMZ - Division of Mammals; UMMZ-oVert; The oVert TCN	male	192.5		Freudenthal, M and Martín-Suárez, E. 2013. Estimating body mass of fossil rodents. Scripta Geol. 145: 1-130.
391	Laurasiatheria	Carnivora	Mustelidae	Mustela_frenata	YPM:VZ:Mamm 014733	Digital	ark:/87602/m4/M64575	Yale Peabody Museum Vertebrate Zoology; The oVert TCN		190.03
392	Euarchontoglires	Rodentia	Spalacidae	Spalax_leucodon	UMMZ:Mamm:110416	Digital	ark:/87602/m4/M65513	UMMZ - Division of Mammals; UMMZ-oVert; The oVert TCN	female	188.67
393	Euarchontoglires	Rodentia	Bathyergidae	Georychus_capensis	MVZ:Mamm:117769	Digital	ark:/87602/m4/M98695	MVZ Project; The oVert TCN		188.36
394	Afrotheria	Afrosoricida	Tenrecidae	Setifer_setosus	UMMZ:Mamm:174775	Digital	doi:10.17602/M2/M55759	UMMZ-oVert; The oVert TCN; UMMZ - Division of Mammals		185
395	Euarchontoglires	Rodentia	Cricetidae	Nectomys_squamipes	UMMZ:Mamm:126275	Digital	ark:/87602/m4/M68594	UMMZ - Division of Mammals; UMMZ-oVert; The oVert TCN	male	184.98
396	Laurasiatheria	Chiroptera	Pteropodidae	Pteropus_pumilus	UMMZ:Mamm:156775	Digital	doi:10.17602/M2/M61952	UMMZ - Division of Mammals; UMMZ-oVert Project; The oVert TCN	male	184.05
397	Euarchontoglires	Rodentia	Muridae	Nesokia_indica	UMMZ:Mamm:120203	Digital	ark:/87602/m4/M68588	UMMZ - Division of Mammals; UMMZ-oVert; The oVert TCN	male	178.08
398	Euarchontoglires	Rodentia	Sciuridae	Lariscus_insignis	MVZ:Mamm:192194	Digital	ark:/87602/m4/M85289	MVZ Project; The oVert TCN		174.41
399	Euarchontoglires	Rodentia	Cricetidae	Chinchillula_sp	AMNH:Mamm:m-249019	Digital	ark:/87602/m4/M101240	AMNH-oVert Project; AMNH Mammaloly; The oVert TCN		169.74	C. sahamae body mass.
400	Laurasiatheria	Chiroptera	Molossidae	Cheiromeles_torquatus	UMMZ:Mamm:174627	Digital	ark:/87602/m4/M57225	UMMZ - Division of Mammals; UMMZ-oVert Project	female	169.43
401	Euarchontoglires	Scandentia	Tupaiidae	Tupaia_dorsalis	UMMZ:Mamm:174427	Digital	ark:/87602/m4/M68615	UMMZ - Division of Mammals; UMMZ-oVert; The oVert TCN		168.05
402	Euarchontoglires	Rodentia	Nesomyidae	Nesomys_rufus	FMNH:Mamm:173271	Digital	ark:/87602/m4/M159987	TEMPO Mammals		163.96
403	Euarchontoglires	Rodentia	Bathyergidae	Heliophobius_argenteocinereus	MCZ:Mamm:59825	Digital	ark:/87602/m4/M84238	MCZ-oVert; The oVert TCN	female	159.46
404	Euarchontoglires	Scandentia	Tupaiidae	Tupaia_sp	DU:EA:179	Digital	doi:10.17602/M2/M28441	Evolutionary Anthropology Department Specimens		156.271	Body mass of genus average.
405	Euarchontoglires	Rodentia	Sciuridae	Tamias_striatus	YPM:VZ:Mamm 014464	Digital	ark:/87602/m4/M64827	Yale Peabody Museum Vertebrate Zoology; The oVert TCN		154		Freudenthal, M and Martín-Suárez, E. 2013. Estimating body mass of fossil rodents. Scripta Geol. 145: 1-130.
406	Afrotheria	Afrosoricida	Tenrecidae	Echinops_telfari	UMMZ:Mamm:175912	Digital	10.17602/M2/M55753	UMMZ-oVert; The oVert TCN; UMMZ - Division of Mammals	female	152.25
407	Euarchontoglires	Lagomorpha	Ochotonidae	Ochotona_alpina	UMMZ:Mamm:123059	Digital	ark:/87602/m4/M89554	TEMPO Mammals		150
408	Euarchontoglires	Rodentia	Cricetidae	Scapteromys_tumidus	UMMZ:Mamm:134434	Digital	ark:/87602/m4/M68597	UMMZ - Division of Mammals; UMMZ-oVert; The oVert TCN	female	146
409	Euarchontoglires	Rodentia	Muridae	Stenocephalemys_albocaudata	CM:Mamm:52575	Digital	ark:/87602/m4/M95877	Carnegie Museum of Natural History - Section of Mammals; The oVert TCN		144
410	Euarchontoglires	Primates	Tarsiidae	Tarsius_sp	DU:EA:032	Digital	doi:10.17602/M2/M27280	Evolutionary Anthropology Department Specimens		139.793	Body mass of genus average.
411	Euarchontoglires	Rodentia	Muridae	Tatera_indica	UMMZ:Mamm:119378	Digital	ark:/87602/m4/M68586	UMMZ - Division of Mammals; UMMZ-oVert; The oVert TCN	male	138.28
412	Euarchontoglires	Rodentia	Echimyidae	Lonchothrix_emiliae	AMNH:Mamm:m-95787	Digital	ark:/87602/m4/M101252	AMNH-oVert Project; AMNH Mammaloly; The oVert TCN		138.2
413	Laurasiatheria	Chiroptera	Pteropodidae	Harpyionycteris_whiteheadi	UMMZ:Mamm:161303	Digital	ark:/87602/m4/M68611	UMMZ - Division of Mammals; UMMZ-oVert Project; The oVert TCN	female	135.48
414	Afrotheria	Afrosoricida	Tenrecidae	Hemicentetes_semispinosus	YPM:VZ:Mamm 005783	Digital	ark:/87602/m4/M64841	The oVert TCN		134
415	Laurasiatheria	Chiroptera	Pteropodidae	Rousettus_aegyptiacus	YPM:VZ:Mamm 014576	Digital	ark:/87602/m4/M64574	Yale Peabody Museum Vertebrate Zoology; The oVert TCN	female	134
416	Euarchontoglires	Rodentia	Gliridae	Glis_glis	UMMZ:Mamm:113304	Digital	doi:10.17602/M2/M64395	UMMZ - Division of Mammals; UMMZ-oVert; The oVert TCN	female	128.09
417	Marsupialia	Diprotodontia	Petauridae	Petaurus_breviceps	FMNH:129430	Digital	ark:/87602/m4/M52791	TEMPO Mammals; Martín-Serra, A. and Benson, R.B. 2020. Developmental constraints do not influence long-term phenotypic evolution of marsupial forelimbs as revealed by interspecific disparity and integration patterns. The Am. Nat. 195(3): 547-560.		120.76
418	Euarchontoglires	Rodentia	Cricetidae	Arvicola_amphibius	UMMZ:Mamm:138456	Digital	ark:/87602/m4/M65521	UMMZ-oVert; The oVert TCN	female	120
419	Euarchontoglires	Rodentia	Muridae	Otomys_irroratus	MVZ:Mamm:117728	Digital	ark:/87602/m4/M85262	MVZ Project; The oVert TCN		114.45
420	Marsupialia	Didelphimorphia	Didelphidae	Glironia_venusta	UMMZ:Mamm:156021	Digital	ark:/87602/m4/M68601	UMMZ - Division of Mammals; UMMZ-oVert Project; The oVert TCN	female	114	Same as Marmosa venusta in MorphoSource.
421	Euarchontoglires	Rodentia	Cricetidae	Sigmodon_hispidus	UMMZ:Mamm:164639	Digital	ark:/87602/m4/M68612	UMMZ - Division of Mammals; UMMZ-oVert; The oVert TCN	male	110.65
422	Euarchontoglires	Rodentia	Cricetidae	Megadontomys_thomasi	UMMZ:Mamm:114816	Digital	ark:/87602/m4/M68579	UMMZ - Division of Mammals; UMMZ-oVert; The oVert TCN	male	110.52
423	Marsupialia	Dasyuromorpha	Dasyuridae	Dasyuroides_byrnei	NHMUK:zoo:1992.02	Digital	ark:/87602/m4/M164550	TEMPO Mammals		109.47
424	Afrotheria	Afrosoricida	Potamogalidae	Micropotamogale_ruwenzorii	NHMUK:67.213	Digital	ark:/87602/m4/M155019	TEMPO Mammals		109.13
425	Euarchontoglires	Rodentia	Heteromyidae	Dipodomys_deserti	UWMB:Mammal:38049	Digital	ark:/87602/m4/M140434	ABAC/oVert Whole Rodent skeleton microCT; The oVert TCN		107.63
426	Euarchontoglires	Rodentia	Muridae	Psammomys_obesus	UMMZ:Mamm:119326	Digital	ark:/87602/m4/M68584	UMMZ - Division of Mammals; UMMZ-oVert; The oVert TCN	female	102.15
427	Euarchontoglires	Rodentia	Nesomyidae	Gymnuromys_roberti	FMNH:Mamm:161906	Digital	ark:/87602/m4/M159926	TEMPO Mammals		97.5
428	Euarchontoglires	Rodentia	Muridae	Arvicanthis_niloticus	UMMZ:Mamm:157598	Digital	ark:/87602/m4/M68606	UMMZ - Division of Mammals; UMMZ-oVert; The oVert TCN	male	95.8
429	Marsupialia	Didelphimorphia	Didelphidae	Monodelphis_domestica	UMMZ:Mamm:165514	Digital	doi:10.17602/M2/M68214	UMMZ - Division of Mammals; TEMPO Mammals; Martín-Serra, A. and Benson, R.B. 2020. Developmental constraints do not influence long-term phenotypic evolution of marsupial forelimbs as revealed by interspecific disparity and integration patterns. The Am. Nat. 195(3): 547-560.		93.45
430	Euarchontoglires	Rodentia	Geomyidae	Thomomys_mazama	UWMB:Mammal:38906	Digital	ark:/87602/m4/M140852	ABAC/oVert Whole Rodent skeleton microCT; The oVert TCN		93.07
431	Euarchontoglires	Rodentia	Muridae	Meriones_tamariscinus	UMMZ:Mamm:119320	Digital	ark:/87602/m4/M68583	UMMZ - Division of Mammals; UMMZ-oVert; The oVert TCN	male	92.4057	Body mass of genus average.
432	Euarchontoglires	Rodentia	Cricetidae	Rhipidomys_fulviventer	UMMZ:Mamm:156377	Digital	doi:10.17602/M2/M70174	UMMZ - Division of Mammals; UMMZ-oVert; The oVert TCN	male	89
433	Euarchontoglires	Rodentia	Dipodidae	Dipus_sagitta	MVZ:Mamm:176844	Digital	ark:/87602/m4/M85272	MVZ Project; The oVert TCN		89
434	Euarchontoglires	Rodentia	Cricetidae	Thomasomys_aureus	UMMZ:Mamm:156177	Digital	doi:10.17602/M2/M70171	UMMZ - Division of Mammals; UMMZ-oVert; The oVert TCN	male	87.99
435	Euarchontoglires	Rodentia	Cricetidae	Ototylomys_phyllotis	UMMZ:Mamm:63549	Digital	ark:/87602/m4/M68624	UMMZ - Division of Mammals; UMMZ-oVert; The oVert TCN	female	86.94
436	Euarchontoglires	Rodentia	Muridae	Stenocephalemys_griseicauda	CM:Mamm:48632	Digital	ark:/87602/m4/M96127	Carnegie Museum of Natural History - Section of Mammals; The oVert TCN		85.75
437	Euarchontoglires	Rodentia	Cricetidae	Habromys_lepturus	UMMZ:Mamm:113793	Digital	ark:/87602/m4/M68575	UMMZ - Division of Mammals; UMMZ-oVert; The oVert TCN	male	84.99
438	Euarchontoglires	Rodentia	Muridae	Tokudaia_muenninki	MSU:MR:MR.12513	Digital	ark:/87602/m4/M86158	MSU-oVert Project; The oVert TCN		84.65	T. osimensis body mass.
439	Xenarthra	Cingulata	Chlamyphoridae	Chlamyphorus_truncatus	FMNH:Mamm:39468	Digital	ark:/87602/m4/M54401	Field Museum of Natural History (Zoology) Mammal Collection; The oVert TCN		83.53
440	Xenarthra	Cingulata	Chlamyphoridae	Chlamyphorus_truncatus	NHMUK:1911.9.6.1	Digital	ark:/87602/m4/M154858	TEMPO Mammals		83.53
441	Euarchontoglires	Rodentia	Cricetidae	Oxymycterus_rufus	UMMZ:Mamm:115500	Digital	ark:/87602/m4/M70168	UMMZ - Division of Mammals; UMMZ-oVert; The oVert TCN	male	82.01
442	Euarchontoglires	Rodentia	Muridae	Niviventer_rapit	UMMZ:Mamm:174433	Digital	ark:/87602/m4/M70177	UMMZ - Division of Mammals; UMMZ-oVert; The oVert TCN	female	79.73
443	Laurasiatheria	Chiroptera	Pteropodidae	Ptenochirus_jagori	UMMZ:Mamm:156741	Digital	ark:/87602/m4/M61951	UMMZ - Division of Mammals; UMMZ-oVert Project; The oVert TCN	female	79.18
444	Laurasiatheria	Chiroptera	Phyllostomidae	Chrotopterus_auritus	UMMZ:Mamm:175769	Digital	ark:/87602/m4/M58371	UMMZ - Division of Mammals; UMMZ-oVert Project	female	78.26
445	Afrotheria	Afrosoricida	Tenrecidae	Microgale_mergulus	mcz:Mamm:45533	Digital	ark:/87602/m4/M81743	MCZ-oVert; The oVert TCN	female	76.86	Same as Limnogale mergulus in MorphoSource.
446	Euarchontoglires	Rodentia	Dipodidae	Stylodipus_andrewsi	MVZ:Mamm:176848	Digital	ark:/87602/m4/M98701	MVZ Project; The oVert TCN		75.32		Shenbrot, G.; Bannikova, A.; Giraudoux, P. et al 2017. A new recent genus and species of three-toed jerboas (Rodentia: Dipodinae) from China: A living fossil? J. Zool. Syst. Evol. Res. 55:356–368.
447	Euarchontoglires	Rodentia	Bathyergidae	Cryptomys_hottentotus	UF:Mammal:24603	Digital	ark:/87602/m4/M140423	ABAC/oVert Whole Rodent skeleton microCT; UF-Mammalogy collections; The oVert TCN		75.13
448	Euarchontoglires	Rodentia	Cricetidae	Prometheomys_schaposchnikowi	UMMZ:Mamm:110414	Digital	ark:/87602/m4/M68564	UMMZ - Division of Mammals; UMMZ-oVert; The oVert TCN	male	75
449	Euarchontoglires	Rodentia	Sciuridae	Glaucomys_volans	YPM:VZ:Mamm 005215	Digital	ark:/87602/m4/M65302	Yale Peabody Museum Vertebrate Zoology; The oVert TCN		71.9
450	Euarchontoglires	Rodentia	Cricetidae	Loxodontomys_micropus	MVZ:Mamm:176761	Digital	ark:/87602/m4/M85201	MVZ Project; The oVert TCN		70.76
451	Euarchontoglires	Rodentia	Cricetidae	Andinomys_sp	AMNH:Mamm:m-278180	Digital	ark:/87602/m4/M101247	AMNH-oVert Project; AMNH Mammaloly; The oVert TCN		69.75	A. edax body mass.
452	Euarchontoglires	Primates	Cheirogaleidae	Microcebus_murinus	DLC:7024m	Digital	doi:10.17602/M2/M17961	Duke Lemur Center Cadaveric Specimens	male	69
453	Euarchontoglires	Rodentia	Cricetidae	Graomys_griseoflavus	UMMZ:Mamm:109231	Digital	ark:/87602/m4/M68561	UMMZ - Division of Mammals; UMMZ-oVert; The oVert TCN	male	68.32
454	Laurasiatheria	Chiroptera	Pteropodidae	Nyctimene_rabori	UMMZ:Mamm:158890	Digital	ark:/87602/m4/M63739	UMMZ - Division of Mammals; UMMZ-oVert Project; The oVert TCN	male	68.25
455	Euarchontoglires	Rodentia	Cricetidae	Lemmus_lemmus	UMMZ:Mamm:57801	Digital	ark:/87602/m4/M64410	UMMZ - Division of Mammals; UMMZ-oVert; The oVert TCN	male	67.62
456	Euarchontoglires	Rodentia	Heteromyidae	Heteromys_nelsoni	UMMZ:Mamm:114492	Digital	ark:/87602/m4/M64396	UMMZ - Division of Mammals; UMMZ-oVert; The oVert TCN		67.55
457	Euarchontoglires	Rodentia	Muridae	Millardia_meltada	MVZ:Mamm:182980	Digital	ark:/87602/m4/M99367	MVZ Project; The oVert TCN		67.17
458	Euarchontoglires	Rodentia	Sciuridae	Tamiops_maritimus	MVZ:Mamm:180950	Digital	ark:/87602/m4/M85280	MVZ Project; The oVert TCN		66.77
459	Euarchontoglires	Rodentia	Cricetidae	Euryoryzomys_macconnelli	UF:Mammal:30789	Digital	ark:/87602/m4/M140444	ABAC/oVert Whole Rodent skeleton microCT; UF-Mammalogy collections; The oVert TCN		66.49	Same as Oryzomys macconnelli in PanTHERIA.
460	Euarchontoglires	Primates	Galagidae	Galagoides_demidovii	DLC:3022m	Digital	doi:10.17602/M2/M26216	Duke Lemur Center Cadaveric Specimens	male	66.04	Same as Galago demidoff in PanTHERIA.
461	Euarchontoglires	Rodentia	Cricetidae	Dicrostonyx_richardsoni	UMMZ:Mamm:114757	Digital	ark:/87602/m4/M57196	UMMZ - Division of Mammals; UMMZ-oVert	male	64.73	Body mass of genus average.
462	Euarchontoglires	Rodentia	Muridae	Pseudomys_higginsi	YPM:VZ:Mamm 005701	Digital	ark:/87602/m4/M90672	Yale Peabody Museum Vertebrate Zoology; The oVert TCN		63.16
463	Afrotheria	Afrosoricida	Chrysochloridae	Amblysomus_hottentotus	MCZ:Mamm:57045	Digital	ark:/87602/m4/M80637	MCZ-oVert; The oVert TCN	male	62.6
464	Marsupialia	Didelphimorphia	Didelphidae	Marmosa_robinsoni	UMMZ:Mamm:117236	Digital	ark:/87602/m4/M64398	UMMZ - Division of Mammals; UMMZ-oVert Project; The oVert TCN	male	60.57
465	Laurasiatheria	Eulipotyphla	Talpidae	Galemys_pyrenaica	MCZ:Mamm:28163	Digital	ark:/87602/m4/M82658	MCZ-oVert; The oVert TCN		60.17
466	Euarchontoglires	Rodentia	Cricetidae	Ellobius_alaicus	UMMZ:Mamm:123043	Digital	doi:10.17602/M2/M65519	UMMZ - Division of Mammals; UMMZ-oVert; The oVert TCN	male	60	Body mass of genus average.
467	Euarchontoglires	Rodentia	Cricetidae	Nyctomys_sumichrasti	UMMZ:Mamm:113823	Digital	ark:/87602/m4/M68577	UMMZ - Division of Mammals; UMMZ-oVert; The oVert TCN	female	59.99
468	Marsupialia	Didelphimorphia	Didelphidae	Marmosops_incanus	FMNH:Mamm:145325	Digital	ark:/87602/m4/M164404	TEMPO Mammals		59.88
469	Euarchontoglires	Rodentia	Dipodidae	Jaculus_jaculus	UMMZ:Mamm:120204	Digital	doi:10.17602/M2/M64399	UMMZ - Division of Mammals; UMMZ-oVert; The oVert TCN	male	59.8
470	Euarchontoglires	Rodentia	Dipodidae	Allactaga_elater	UF:Mammal:30045	Digital	ark:/87602/m4/M133921	ABAC/oVert Whole Rodent skeleton microCT; UF-Mammalogy collections; The oVert TCN		59
471	Laurasiatheria	Chiroptera	Pteropodidae	Eonycteris_spelaea	UMMZ:Mamm:161208	Digital	ark:/87602/m4/M58361	UMMZ - Division of Mammals; UMMZ-oVert Project	female	58.7
472	Euarchontoglires	Rodentia	Muridae	Lophuromys_flavopunctatus	UMMZ:Mamm:114774	Digital	ark:/87602/m4/M68578	UMMZ - Division of Mammals; UMMZ-oVert; The oVert TCN	female	57.07
473	Euarchontoglires	Rodentia	Muridae	Sekeetamys_calurus	UMMZ:Mamm:119351	Digital	ark:/87602/m4/M68585	UMMZ - Division of Mammals; UMMZ-oVert; The oVert TCN	male	56.61
474	Marsupialia	Notoryctemorphia	Notoryctidae	Notoryctes_typhlops	MCZ:Mamm:28158	Digital	ark:/87602/m4/M81856	MCZ-oVert; The oVert TCN		55
475	Euarchontoglires	Rodentia	Muridae	Desmodillus_auricularis	UMMZ:Mamm:111122	Digital	ark:/87602/m4/M68567	UMMZ - Division of Mammals; UMMZ-oVert; The oVert TCN	male	54.81
476	Euarchontoglires	Rodentia	Muridae	Hybomys_univittatus	MVZ:Mamm:196296	Digital	ark:/87602/m4/M85202	MVZ Project; The oVert TCN		54.46
477	Euarchontoglires	Rodentia	Muridae	Chrotomys_whiteheadi	UMMZ:Mamm:174496	Digital	ark:/87602/m4/M70178	UMMZ - Division of Mammals; UMMZ-oVert; The oVert TCN	male	54.33
478	Euarchontoglires	Rodentia	Cricetidae	Lemmus_sibiricus	UMMZ:Mamm:110403	Digital	ark:/87602/m4/M57192	UMMZ - Division of Mammals; UMMZ-oVert	male	53.81
479	Euarchontoglires	Rodentia	Cricetidae	Lenoxus_apicalis	MVZ:Mamm:172346	Digital	ark:/87602/m4/M85198	MVZ Project; The oVert TCN		53.6
480	Euarchontoglires	Rodentia	Cricetidae	Oryzomys_palustris	UMMZ:Mamm:110387	Digital	ark:/87602/m4/M68562	UMMZ - Division of Mammals; UMMZ-oVert; The oVert TCN	male	53.26
481	Euarchontoglires	Rodentia	Cricetidae	Hyperacrius_wynnei	UMMZ:Mamm:167666	Digital	ark:/87602/m4/M57218	UMMZ - Division of Mammals; UMMZ-oVert	male	52.6
482	Euarchontoglires	Rodentia	Muridae	Taterillus_harringtoni	UMMZ:Mamm:122871	Digital	ark:/87602/m4/M70170	UMMZ - Division of Mammals; UMMZ-oVert; The oVert TCN	male	52.2725	Body mass of genus average.
483	Euarchontoglires	Rodentia	Cricetidae	Zygodontomys_brevicauda	UMMZ:Mamm:111960	Digital	ark:/87602/m4/M68573	UMMZ - Division of Mammals; UMMZ-oVert; The oVert TCN	male	52.22
484	Euarchontoglires	Rodentia	Muridae	Mastomys_sp	UMMZ:Mamm:120407	Digital	ark:/87602/m4/M70169	UMMZ - Division of Mammals; UMMZ-oVert; The oVert TCN	male	51.5575	Body mass of genus average.
485	Euarchontoglires	Rodentia	Nesomyidae	Saccostomus_campestris	MVZ:Mamm:118603	Digital	ark:/87602/m4/M98043	MVZ Project; The oVert TCN		50.33
486	Euarchontoglires	Rodentia	Cricetidae	Phyllotis_sp	UMMZ:Mamm:156344	Digital	ark:/87602/m4/M70173	UMMZ - Division of Mammals; UMMZ-oVert; The oVert TCN	female	50.0808	Body mass of genus average.
487	Euarchontoglires	Rodentia	Cricetidae	Allocricetulus_eversmanni	UMMZ:Mamm:111194	Digital	ark:/87602/m4/M68570	UMMZ-oVert; The oVert TCN	male	50		Ushakova M.V.; Feoktistova, N.Y.; Petrovski, D. et al. 2012. Hibernation in the Eversman Hamster (Allocricetulus eversmanni Brandt, 1859) from the Saratov Trans-Volga region. Biol. Bull. 39(10): 846–851.
488	Euarchontoglires	Rodentia	Cricetidae	Osgoodomys_banderanus	UMMZ:Mamm:113787	Digital	ark:/87602/m4/M68574	UMMZ - Division of Mammals; UMMZ-oVert; The oVert TCN		49.99
489	Euarchontoglires	Rodentia	Cricetidae	Auliscomys_pictus	MVZ:Mamm:174309	Digital	ark:/87602/m4/M85271	MVZ Project; The oVert TCN		48.97
490	Laurasiatheria	Eulipotyphla	Talpidae	Condylura_cristata	YPM:VZ:Mamm 014548	Digital	ark:/87602/m4/M64579	Yale Peabody Museum Vertebrate Zoology; The oVert TCN		48.15
491	Euarchontoglires	Rodentia	Muridae	Pachyuromys_duprasi	YPM:VZ:Mamm 005826	Digital	ark:/87602/m4/M85263	MVZ Project; The oVert TCN	male	47.5
492	Euarchontoglires	Rodentia	Muridae	Pachyuromys_duprasi	UMMZ:Mamm:119424	Digital	ark:/87602/m4/M82770	UMMZ - Division of Mammals; UMMZ-oVert; The oVert TCN	male	47.5
493	Laurasiatheria	Chiroptera	Phyllostomidae	Brachyphylla_cavernarum	YPM:VZ:Mamm 006022	Digital	ark:/87602/m4/M64569	Yale Peabody Museum Vertebrate Zoology; The oVert TCN		45.5
494	Euarchontoglires	Rodentia	Cricetidae	Pseudoryzomys_simplex	UMMZ:Mamm:134387	Digital	ark:/87602/m4/M64402	UMMZ - Division of Mammals; UMMZ-oVert; The oVert TCN	male	45.2
495	Afrotheria	Macroscelidea	Macroscelididae	Elephantulus_brachyrhynchus	NHMUK:1963.1004	Digital	ark:/87602/m4/M157351	TEMPO Mammals		45.11
496	Laurasiatheria	Chiroptera	Pteropodidae	Myonycteris_torquata	YPM:VZ:Mamm 014565	Digital	ark:/87602/m4/M64573	Yale Peabody Museum Vertebrate Zoology; The oVert TCN		44.92
497	Euarchontoglires	Rodentia	Cricetidae	Neotomodon_alstoni	UMMZ:Mamm:111938	Digital	ark:/87602/m4/M68572	UMMZ - Division of Mammals; UMMZ-oVert; The oVert TCN	male	44.64
498	Laurasiatheria	Eulipotyphla	Soricidae	Suncus_murinus	UMMZ:Mamm:115820	Digital	ark:/87602/m4/M68581	UMMZ - Division of Mammals; UMMZ-oVert Project; The oVert TCN	female	43.76
499	Euarchontoglires	Scandentia	Ptilocercidae	Ptilocercus_lowii	FMNH:Mamm:57450	Digital	ark:/87602/m4/M57402	Field Museum of Natural History (Zoology) Mammal Collection; The oVert TCN	female	42.5
500	Euarchontoglires	Rodentia	Muridae	Grammomys_dolichurus	MVZ:Mamm:220992	Digital	ark:/87602/m4/M85203	MVZ Project; The oVert TCN		41.85
501	Euarchontoglires	Rodentia	Muridae	Acomys_cahirinus	YPM:VZ:Mamm 005794	Digital	ark:/87602/m4/M64826	Yale Peabody Museum Vertebrate Zoology; The oVert TCN	male	41.16
502	Euarchontoglires	Rodentia	Cricetidae	Melanomys_caliginosus	UMMZ:Mamm:174810	Digital	ark:/87602/m4/M68618	UMMZ - Division of Mammals; UMMZ-oVert; The oVert TCN	male	41
503	Euarchontoglires	Rodentia	Muridae	Rhabdomys_pumilio	MVZ:Mamm:117451	Digital	ark:/87602/m4/M98041	MVZ Project; The oVert TCN		40.73
504	Euarchontoglires	Rodentia	Cricetidae	Microtus_afghanus	UMMZ:Mamm:110407	Digital	ark:/87602/m4/M68563	UMMZ - Division of Mammals; UMMZ-oVert; The oVert TCN	male	40.53
505	Euarchontoglires	Rodentia	Cricetidae	Necromys_lasiurus	UMMZ:Mamm:134432	Digital	ark:/87602/m4/M68596	UMMZ - Division of Mammals; UMMZ-oVert; The oVert TCN	female	39.93
506	Euarchontoglires	Rodentia	Heterocephalidae	Heterocephalus_glaber	UMMZ:Mamm:172915	Digital	ark:/87602/m4/M68614	UMMZ - Division of Mammals; UMMZ-oVert; The oVert TCN	female	39.36
507	Euarchontoglires	Rodentia	Heterocephalidae	Heterocephalus_glaber	UF:Mammal:6289	Digital	ark:/87602/m4/M140449	ABAC/oVert Whole Rodent skeleton microCT; UF-Mammalogy collections; The oVert TCN		39.36
508	Euarchontoglires	Rodentia	Cricetidae	Microtus_chrotorrhinus	UMMZ:Mamm:138423	Digital	ark:/87602/m4/M57210	UMMZ - Division of Mammals; UMMZ-oVert	female	38.99
509	Euarchontoglires	Rodentia	Cricetidae	Abrothrix_longipilis	MVZ:Mamm:163725	Digital	ark:/87602/m4/M99364	MVZ Project; The oVert TCN		38.86
510	Afrotheria	Macroscelidea	Macroscelididae	Macroscelides_micus	CAS:mam:30345	Digital	ark:/87602/m4/M83184	CAS-oVert; The oVert TCN	male	38.64
511	Afrotheria	Macroscelidea	Macroscelididae	Macroscelides_proboscideus	FMNH:Mamm:137045	Digital	ark:/87602/m4/M157790	TEMPO Mammals		38.64
512	Euarchontoglires	Rodentia	Muridae	Praomys_sp	MCZ:Mamm:62412	Digital	ark:/87602/m4/M84303	MCZ-oVert; The oVert TCN		37.75	Body mass of genus average.
513	Euarchontoglires	Rodentia	Cricetidae	Alticola_argentatus	UF:Mammal:27219	Digital	ark:/87602/m4/M133925	ABAC/oVert Whole Rodent skeleton microCT; UF-Mammalogy collections; The oVert TCN		37.69
514	Afrotheria	Afrosoricida	Chrysochloridae	Chrysochloris_asiatica	MVZ:Mamm:183379	Digital	ark:/87602/m4/M85283	MVZ Project; The oVert TCN		37.16
515	Laurasiatheria	Chiroptera	Phyllostomidae	Trachops_cirrhosus	UMMZ:Mamm:164884	Digital	ark:/87602/m4/M58363	UMMZ - Division of Mammals; UMMZ-oVert Project		36.9
516	Laurasiatheria	Chiroptera	Phyllostomidae	Phyllostomus_discolor	UMMZ:Mamm:116027	Digital	ark:/87602/m4/M58345	UMMZ - Division of Mammals; UMMZ-oVert Project	male	36.7
517	Laurasiatheria	Chiroptera	Molossidae	Tadarida_australis	UMMZ:Mamm:164676	Digital	ark:/87602/m4/M57249	UMMZ - Division of Mammals; UMMZ-oVert Project	female	36.4
518	Laurasiatheria	Chiroptera	Phyllostomidae	Vampyrodes_caraccioli	UMMZ:Mamm:158066	Digital	ark:/87602/m4/M58357	UMMZ - Division of Mammals; UMMZ-oVert Project	male	35.89
519	Laurasiatheria	Chiroptera	Pteropodidae	Penthetor_lucasi	UMMZ:Mamm:174604	Digital	ark:/87602/m4/M61965	UMMZ - Division of Mammals; UMMZ-oVert Project; The oVert TCN	female	35.39
520	Laurasiatheria	Chiroptera	Molossidae	Otomops_martiensseni	UMMZ:Mamm:175808	Digital	ark:/87602/m4/M57240	UMMZ - Division of Mammals; UMMZ-oVert Project	male	34.92
521	Laurasiatheria	Chiroptera	Pteropodidae	Cynopterus_brachyotis	UMMZ:Mamm:130388	Digital	ark:/87602/m4/M58351	UMMZ - Division of Mammals; UMMZ-oVert Project	male	33.87
522	Euarchontoglires	Rodentia	Cricetidae	Handleyomys_alfaroi	UMMZ:Mamm:116889	Digital	ark:/87602/m4/M113722	UMMZ - Division of Mammals; UMMZ-oVert; The oVert TCN		33.3	Same as Oryzomys alfaroi in PanTHERIA.
523	Laurasiatheria	Chiroptera	Phyllostomidae	Desmodus_rotundus	UMMZ:Mamm:175606	Digital	ark:/87602/m4/M58370	UMMZ - Division of Mammals; UMMZ-oVert Project	female	33.16
524	Laurasiatheria	Chiroptera	Noctilionidae	Noctilio_albiventris	UMMZ:Mamm:175795	Digital	doi:10.17602/M2/M57238	UMMZ - Division of Mammals; UMMZ-oVert Project	male	31.46
525	Laurasiatheria	Chiroptera	Molossidae	Mops_mops	UMMZ:Mamm:174631	Digital	ark:/87602/m4/M57227	UMMZ - Division of Mammals; UMMZ-oVert Project	male	31.12
526	Euarchontoglires	Rodentia	Muridae	Apomys_litoralis	UMMZ:Mamm:160321	Digital	ark:/87602/m4/M70176	UMMZ - Division of Mammals; UMMZ-oVert; The oVert TCN	male	30.95
527	Euarchontoglires	Rodentia	Cricetidae	Geoxus_valdivianus	MVZ:Mamm:158411	Digital	ark:/87602/m4/M85266	MVZ Project; The oVert TCN		30.8
528	Euarchontoglires	Rodentia	Cricetidae	Podomys_floridanus	UMMZ:Mamm:103733	Digital	ark:/87602/m4/M64393	UMMZ - Division of Mammals; UMMZ-oVert; The oVert TCN	male	30.74
529	Euarchontoglires	Rodentia	Dipodidae	Euchoreutes_naso	MVZ:Mamm:179169	Digital	ark:/87602/m4/M85278	MVZ Project; The oVert TCN		30.7		Stubbe, A.; Stubbe, M.; Batsajchan, N. et al. 2007. Euchoreutes naso Sclater, 1890 – ein Säugetier-Endemit Zentralasiens. Erforsch. biol. Ress. Mongolei (10): 471-486.
530	Euarchontoglires	Rodentia	Cricetidae	Cricetulus_barabensis	UMMZ:Mamm:111191	Digital	doi:10.17602/M2/M68568	UMMZ - Division of Mammals; UMMZ-oVert; The oVert TCN	male	30.59	C. migratorius body mass.
531	Euarchontoglires	Rodentia	Nesomyidae	Steatomys_pratensis	MSU:MR:MR.24868	Digital	ark:/87602/m4/M86528	MSU-oVert Project; The oVert TCN		30.58
532	Euarchontoglires	Rodentia	Cricetidae	Onychomys_leucogaster	UMMZ:Mamm:62316	Digital	doi:10.17602/M2/M68621	UMMZ - Division of Mammals; UMMZ-oVert; The oVert TCN	male	30
533	Euarchontoglires	Rodentia	Cricetidae	Myopus_schisticolor	MVZ:Mamm:173692	Digital	ark:/87602/m4/M85199	MVZ Project; The oVert TCN		29.99
534	Laurasiatheria	Chiroptera	Phyllostomidae	Artibeus_planirostris	UMMZ:Mamm:156082	Digital	ark:/87602/m4/M57263	UMMZ - Division of Mammals; UMMZ-oVert Project	male	29.8629	Body mass of genus average.
535	Laurasiatheria	Chiroptera	Molossidae	Promops_centralis	UMMZ:Mamm:134253	Digital	ark:/87602/m4/M57259	UMMZ - Division of Mammals; UMMZ-oVert Project	male	29.8
536	Euarchontoglires	Rodentia	Gliridae	Dryomys_nitedula	UMMZ:Mamm:123085	Digital	doi:10.17602/M2/M64400	UMMZ - Division of Mammals; UMMZ-oVert; The oVert TCN	female	29.5
537	Euarchontoglires	Rodentia	Gliridae	Muscardinus_avellanarius	UMMZ:Mamm:103438	Digital	doi:10.17602/M2/M64392	UMMZ - Division of Mammals; UMMZ-oVert; The oVert TCN	male	29.19
538	Marsupialia	Dasyuromorpha	Dasyuridae	Antechinus_stuartii	FMNH:Mamm:129556	Digital	ark:/87602/m4/M82261	TEMPO Mammals; Martín-Serra, A. and Benson, R.B. 2020. Developmental constraints do not influence long-term phenotypic evolution of marsupial forelimbs as revealed by interspecific disparity and integration patterns. The Am. Nat. 195(3): 547-560.		29.01
539	Euarchontoglires	Rodentia	Cricetidae	Phodopus_roborovskii	UMMZ:Mamm:124118	Digital	ark:/87602/m4/M68593	UMMZ - Division of Mammals; UMMZ-oVert; The oVert TCN	female	28.745	Body mass of genus average.
540	Marsupialia	Paucituberculata	Caenolestidae	Caenolestes_fuliginosus	UMZC:Vertebrates:a8. 2/3	Digital	ark:/87602/m4/M164556	TEMPO Mammals		28.64
541	Euarchontoglires	Rodentia	Nesomyidae	Macrotarsomys_bastardi	FMNH:Mamm:179397	Digital	ark:/87602/m4/M159959	TEMPO Mammals		28.45
542	Euarchontoglires	Rodentia	Cricetidae	Akodon_boliviensis	UMMZ:Mamm:160805	Digital	doi:10.17602/M2/M68610	UMMZ-oVert; The oVert TCN	male	27.5
543	Euarchontoglires	Rodentia	Cricetidae	Peromyscus_truei	UMMZ:Mamm:59361	Digital	ark:/87602/m4/M76617	UMMZ - Division of Mammals; UMMZ-oVert; The oVert TCN	male	27
544	Euarchontoglires	Rodentia	Muridae	Gerbillus_gerbillus	UMMZ:Mamm:156635	Digital	ark:/87602/m4/M68605	UMMZ - Division of Mammals; UMMZ-oVert; The oVert TCN	male	26.99
545	Laurasiatheria	Chiroptera	Megadermatidae	Cardioderma_cor	YPM:VZ:Mamm 005622	Digital	ark:/87602/m4/M64568	Yale Peabody Museum Vertebrate Zoology; The oVert TCN		26.45
546	Marsupialia	Dasyuromorpha	Dasyuridae	Antechinomys_laniger	NHMUK:zoo:zd 1932.2.11.23	Digital	ark:/87602/m4/M82407	TEMPO Mammals; Martín-Serra, A. and Benson, R.B. 2020. Developmental constraints do not influence long-term phenotypic evolution of marsupial forelimbs as revealed by interspecific disparity and integration patterns. The Am. Nat. 195(3): 547-560.		25.57
547	Euarchontoglires	Rodentia	Cricetidae	Andalgalomys_pearsoni	UMMZ:Mamm:134386	Digital	ark:/87602/m4/M65520	UMMZ-oVert; The oVert TCN	male	25.4
548	Laurasiatheria	Chiroptera	Pteropodidae	Micropteropus_pusillus	UMMZ:Mamm:124088	Digital	ark:/87602/m4/M58348	UMMZ - Division of Mammals; UMMZ-oVert Project	female	25.38
549	Laurasiatheria	Chiroptera	Pteropodidae	Micropteropus_pusillus	YPM:VZ:Mamm 014564	Digital	ark:/87602/m4/M64572	Yale Peabody Museum Vertebrate Zoology; The oVert TCN	male	25.38
550	Euarchontoglires	Rodentia	Cricetidae	Oligoryzomys_fulvescens	UMMZ:Mamm:123200	Digital	ark:/87602/m4/M68592	UMMZ - Division of Mammals; UMMZ-oVert; The oVert TCN	female	25
551	Euarchontoglires	Rodentia	Nesomyidae	Monticolomys_koopmani	FMNH:Mamm:161705	Digital	ark:/87602/m4/M159972	TEMPO Mammals		25
552	Marsupialia	Microbiotheria	Microbiotheriidae	Dromiciops_gliroides	UMMZ:Mamm:156354	Digital	doi:10.17602/M2/M68206	UMMZ - Division of Mammals; TEMPO Mammals; Martín-Serra, A. and Benson, R.B. 2020. Developmental constraints do not influence long-term phenotypic evolution of marsupial forelimbs as revealed by interspecific disparity and integration patterns. The Am. Nat. 195(3): 547-560.		25	Same as Dromiciops australis.
553	Laurasiatheria	Chiroptera	Pteropodidae	Paranyctimene_raptor	YPM:VZ:Mamm 005629	Digital	ark:/87602/m4/M64832	Yale Peabody Museum Vertebrate Zoology; The oVert TCN		24.94
554	Laurasiatheria	Chiroptera	Megadermatidae	Megaderma_spasma	UMMZ:Mamm:163615	Digital	ark:/87602/m4/M57216	UMMZ - Division of Mammals; UMMZ-oVert Project	male	24.71
555	Euarchontoglires	Rodentia	Cricetidae	Thalpomys_lasiotis	MSU:MR:MR.29355	Digital	ark:/87602/m4/M86161	MSU-oVert Project; The oVert TCN		23.99
556	Laurasiatheria	Chiroptera	Phyllostomidae	Chiroderma_villosum	UMMZ:Mamm:168883	Digital	ark:/87602/m4/M57265	UMMZ - Division of Mammals; UMMZ-oVert Project	female	23.81
557	Laurasiatheria	Chiroptera	Megadermatidae	Lavia_frons	MCZ:Mamm:52243	Digital	ark:/87602/m4/M84553	MCZ-oVert; The oVert TCN		23.8
558	Laurasiatheria	Chiroptera	Phyllostomidae	Centurio_senex	UMMZ:Mamm:115176	Digital	ark:/87602/m4/M58341	UMMZ - Division of Mammals; UMMZ-oVert Project	female	23.09
559	Marsupialia	Paucituberculata	Caenolestidae	Lestoros_inca	UMMZ:Mamm:160733	Digital	doi:10.17602/M2/M82366	UMMZ - Division of Mammals; TEMPO Mammals; Martín-Serra, A. and Benson, R.B. 2020. Developmental constraints do not influence long-term phenotypic evolution of marsupial forelimbs as revealed by interspecific disparity and integration patterns. The Am. Nat. 195(3): 547-560.		23.07
560	Euarchontoglires	Rodentia	Cricetidae	Ochrotomys_nuttalli	UMMZ:Mamm:93497	Digital	ark:/87602/m4/M68627	UMMZ - Division of Mammals; UMMZ-oVert; The oVert TCN	male	22.81
561	Euarchontoglires	Rodentia	Zapodidae	Napaeozapus_insignis	MSB:Mamm:309389	Digital	ark:/87602/m4/M125073	The oVert TCN		22.25
562	Laurasiatheria	Chiroptera	Vespertilionidae	Antrozous_pallidus	UMMZ:Mamm:101281	Digital	ark:/87602/m4/M61946	UMMZ - Division of Mammals; UMMZ-oVert Project; The oVert TCN	female	22.24
563	Afrotheria	Afrosoricida	Chrysochloridae	Eremitalpa_granti	MVZ:Mamm:183384	Digital	ark:/87602/m4/M85284	MVZ Project; The oVert TCN		22.04
564	Marsupialia	Didelphimorphia	Didelphidae	Gracilinanus_agilis	UMMZ:Mamm:134557	Digital	doi:10.17602/M2/M82358	UMMZ - Division of Mammals; TEMPO Mammals; Martín-Serra, A. and Benson, R.B. 2020. Developmental constraints do not influence long-term phenotypic evolution of marsupial forelimbs as revealed by interspecific disparity and integration patterns. The Am. Nat. 195(3): 547-560.		22.03
565	Marsupialia	Paucituberculata	Caenolestidae	Rhyncholestes_raphanurus	FMNH:Mamm:127476	Digital	ark:/87602/m4/M82330	TEMPO Mammals; Martín-Serra, A. and Benson, R.B. 2020. Developmental constraints do not influence long-term phenotypic evolution of marsupial forelimbs as revealed by interspecific disparity and integration patterns. The Am. Nat. 195(3): 547-560.		21.94
566	Euarchontoglires	Rodentia	Calomyscidae	Calomyscus_bailwardi	UMMZ:Mamm:167649	Digital	doi:10.17602/M2/M64407	UMMZ-oVert; The oVert TCN	female	21.38
567	Euarchontoglires	Rodentia	Calomyscidae	Calomyscus_baluchi	UF:Mammal:28671	Digital	ark:/87602/m4/M140390	ABAC/oVert Whole Rodent skeleton microCT; UF-Mammalogy collections; The oVert TCN		21.38	C. bailwardi body mass.
568	Euarchontoglires	Rodentia	Muridae	Apodemus_agrarius	UMMZ:Mamm:62380	Digital	ark:/87602/m4/M68622	UMMZ - Division of Mammals; UMMZ-oVert; The oVert TCN		21.11
569	Laurasiatheria	Chiroptera	Phyllostomidae	Stenoderma_rufum	UMMZ:Mamm:156616	Digital	ark:/87602/m4/M58354	UMMZ - Division of Mammals; UMMZ-oVert Project	male	21.1
570	Laurasiatheria	Chiroptera	Phyllostomidae	Sturnira_ludovici	UMMZ:Mamm:113642	Digital	ark:/87602/m4/M58339	UMMZ - Division of Mammals; UMMZ-oVert Project	male	21
571	Euarchontoglires	Rodentia	Cricetidae	Lagurus_curtatus	UMMZ:Mamm:115494	Digital	ark:/87602/m4/M68580	UMMZ - Division of Mammals; UMMZ-oVert; The oVert TCN	male	20.6
572	Laurasiatheria	Chiroptera	Vespertilionidae	Scotophilus_kuhlii	UMMZ:Mamm:156908	Digital	ark:/87602/m4/M61955	UMMZ - Division of Mammals; UMMZ-oVert Project; The oVert TCN	female	20.31
573	Euarchontoglires	Rodentia	Gliridae	Graphiurus_murinus	YPM:VZ:Mamm 014485	Digital	ark:/87602/m4/M89787	Yale Peabody Museum Vertebrate Zoology; The oVert TCN		20.07
574	Euarchontoglires	Rodentia	Cricetidae	Myodes_rutilus	UMMZ:Mamm:62533	Digital	ark:/87602/m4/M70180	UMMZ - Division of Mammals; UMMZ-oVert; The oVert TCN		19.94
575	Euarchontoglires	Rodentia	Cricetidae	Thaptomys_nigrita	UMMZ:Mamm:134511	Digital	ark:/87602/m4/M68598	UMMZ - Division of Mammals; UMMZ-oVert; The oVert TCN	male	19.9
576	Euarchontoglires	Rodentia	Cricetidae	Eothenomys_melanogaster	MVZ:Mamm:180936	Digital	ark:/87602/m4/M85279	MVZ Project; The oVert TCN		19.59
577	Laurasiatheria	Chiroptera	Mormoopidae	Pteronotus_parnellii	UMMZ:Mamm:175621	Digital	doi:10.17602/M2/M57270	UMMZ - Division of Mammals; UMMZ-oVert Project	male	19.59
578	Laurasiatheria	Chiroptera	Phyllostomidae	Phyllops_falcatus	UMMZ:Mamm:124092	Digital	ark:/87602/m4/M58372	UMMZ - Division of Mammals; UMMZ-oVert Project	female	19.5		Tavares, V.C. and Mancina, C.A. 2008. Phyllops falcatus (Chiroptera:Phyllostomidae). Mamm. Species. 811:1-7.
579	Euarchontoglires	Rodentia	Muridae	Mus_musculus	YPM:VZ:Mamm 005792	Digital	ark:/87602/m4/M64828	Yale Peabody Museum Vertebrate Zoology; The oVert TCN	male	19.3
580	Euarchontoglires	Rodentia	Muridae	Mus_musculus	UMMZ:Mamm:57532	Digital	ark:/87602/m4/M82217	UMMZ - Division of Mammals; UMMZ-oVert; The oVert TCN	female	19.3
581	Euarchontoglires	Rodentia	Cricetidae	Chilomys_instans	UMMZ:Mamm:155796	Digital	doi:10.17602/M2/M64403	UMMZ - Division of Mammals; UMMZ-oVert; The oVert TCN	male	19
582	Laurasiatheria	Eulipotyphla	Soricidae	Blarina_brevicauda	UMMZ:Mamm:47268	Digital	doi:10.17602/M2/M68619	UMMZ - Division of Mammals; UMMZ-oVert Project; The oVert TCN	female	18.56
583	Laurasiatheria	Chiroptera	Phyllostomidae	Pygoderma_bilabiatum	UMMZ:Mamm:134227	Digital	ark:/87602/m4/M58353	UMMZ - Division of Mammals; UMMZ-oVert Project; The oVert TCN	female	18.5
584	Euarchontoglires	Rodentia	Zapodidae	Zapus_hudsonius	YPM:VZ:Mamm 005659	Digital	ark:/87602/m4/M64824	Yale Peabody Museum Vertebrate Zoology; The oVert TCN		18.43
585	Laurasiatheria	Chiroptera	Phyllostomidae	Platalina_genovensium	MCZ:Mamm:49468	Digital	ark:/87602/m4/M82933	MCZ-oVert; The oVert TCN	male	18.375		Velazco, P.M. and Cadenillas, R. 2013. New records of Platalina genovensium Thomas, 1928 (Chiroptera, Phyllostomidae, Lonchophyllinae) and Tomopeas ravus Miller, 1900 (Chiroptera, Molossidae, Tomopeatinae). Mastozool. Neotrop. 20(2):425-434.
586	Laurasiatheria	Chiroptera	Pteropodidae	Haplonycteris_fischeri	UMMZ:Mamm:157351	Digital	ark:/87602/m4/M58355	UMMZ - Division of Mammals; UMMZ-oVert Project	female	18.25
587	Euarchontoglires	Rodentia	Cricetidae	Peromyscus_leucopus	UMMZ:Mamm:175564	Digital	ark:/87602/m4/M57267	UMMZ - Division of Mammals; UMMZ-oVert	male	18.07
588	Euarchontoglires	Rodentia	Cricetidae	Neacomys_sp	UMMZ:Mamm:156291	Digital	ark:/87602/m4/M68603	UMMZ - Division of Mammals; UMMZ-oVert; The oVert TCN	female	17.95	Body mass of genus average.
589	Marsupialia	Didelphimorphia	Didelphidae	Thylamys_venustus	UMMZ:Mamm:156033	Digital	doi:10.17602/M2/M82399	UMMZ - Division of Mammals; TEMPO Mammals; Martín-Serra, A. and Benson, R.B. 2020. Developmental constraints do not influence long-term phenotypic evolution of marsupial forelimbs as revealed by interspecific disparity and integration patterns. The Am. Nat. 195(3): 547-560.		17.8		Amador, L.I. and Giannini, N.P. 2016. Phylogeny and evolution of body mass in didelphid marsupials (Marsupialia: Didelphimorphia: Didelphidae). Org. Divers. Evol. 16: 641–657.
590	Euarchontoglires	Rodentia	Cricetidae	Eligmodontia_typus	UMMZ:Mamm:115506	Digital	ark:/87602/m4/M65517	UMMZ - Division of Mammals; UMMZ-oVert; The oVert TCN	female	17.37
591	Laurasiatheria	Chiroptera	Phyllostomidae	Choeronycteris_mexicana	UMMZ:Mamm:77751	Digital	ark:/87602/m4/M58373	UMMZ - Division of Mammals; UMMZ-oVert Project	male	17.26
592	Euarchontoglires	Rodentia	Nesomyidae	Malacothrix_typica	UMMZ:Mamm:117815	Digital	ark:/87602/m4/M141168	UMMZ - Division of Mammals; TEMPO Mammals		17.02
593	Laurasiatheria	Chiroptera	Phyllostomidae	Enchisthenes_hartii	UMMZ:Mamm:114485	Digital	ark:/87602/m4/M58340	UMMZ - Division of Mammals; UMMZ-oVert Project	female	16.99
594	Laurasiatheria	Chiroptera	Pteropodidae	Macroglossus_minimus	YPM:VZ:Mamm 005631	Digital	ark:/87602/m4/M65078	Yale Peabody Museum Vertebrate Zoology; The oVert TCN	female	16.3
595	Laurasiatheria	Chiroptera	Pteropodidae	Macroglossus_minimus	UMMZ:Mamm:162913	Digital	ark:/87602/m4/M58362	UMMZ - Division of Mammals; UMMZ-oVert Project	female	16.3
596	Laurasiatheria	Chiroptera	Vespertilionidae	Hesperoptenus_tickelli	UMMZ:Mamm:172252	Digital	ark:/87602/m4/M61962	UMMZ - Division of Mammals; UMMZ-oVert Project; The oVert TCN	male	16.3
597	Laurasiatheria	Chiroptera	Phyllostomidae	Uroderma_bilobatum	UMMZ:Mamm:127216	Digital	ark:/87602/m4/M58350	UMMZ - Division of Mammals; UMMZ-oVert Project	female	16.28
598	Laurasiatheria	Chiroptera	Mormoopidae	Mormoops_megalophylla	UMMZ:Mamm:111721	Digital	ark:/87602/m4/M58337	UMMZ - Division of Mammals; UMMZ-oVert Project	female	16.09
599	Marsupialia	Dasyuromorpha	Dasyuridae	Sminthopsis_crassicaudata	FMNH:Mamm:72923	Digital	ark:/87602/m4/M82320	TEMPO Mammals; Martín-Serra, A. and Benson, R.B. 2020. Developmental constraints do not influence long-term phenotypic evolution of marsupial forelimbs as revealed by interspecific disparity and integration patterns. The Am. Nat. 195(3): 547-560.		15.98
600	Marsupialia	Diprotodontia	Burramyidae	Cercartetus_concinnus	NHMUK:zoo:zd 1897.11.18.1	Digital	ark:/87602/m4/M82415	TEMPO Mammals; Martín-Serra, A. and Benson, R.B. 2020. Developmental constraints do not influence long-term phenotypic evolution of marsupial forelimbs as revealed by interspecific disparity and integration patterns. The Am. Nat. 195(3): 547-560.		15.96	Same as Dromicia concinna in MorphoSource.
601	Euarchontoglires	Rodentia	Heteromyidae	Chaetodipus_penicillatus	UF:Mammal:10053	Digital	ark:/87602/m4/M140401	ABAC/oVert Whole Rodent skeleton microCT; UF-Mammalogy collections; The oVert TCN		15.57
602	Laurasiatheria	Chiroptera	Phyllostomidae	Lonchorhina_aurita	UMMZ:Mamm:111319	Digital	ark:/87602/m4/M58336	UMMZ - Division of Mammals; UMMZ-oVert Project	male	15.38
603	Laurasiatheria	Eulipotyphla	Soricidae	Neomys_fodiens	UMMZ:Mamm:157664	Digital	ark:/87602/m4/M68607	UMMZ - Division of Mammals; UMMZ-oVert Project; The oVert TCN		15.26
604	Laurasiatheria	Chiroptera	Phyllostomidae	Anoura_geoffroyi	YPM:VZ:Mamm 014593	Digital	ark:/87602/m4/M64829	Yale Peabody Museum Vertebrate Zoology; The oVert TCN		15.15
605	Laurasiatheria	Chiroptera	Pteropodidae	Aethalops_alecto	UMMZ:Mamm:174565	Digital	ark:/87602/m4/M58367	UMMZ - Division of Mammals; UMMZ-oVert Project	female	15
606	Laurasiatheria	Chiroptera	Pteropodidae	Balionycteris_maculata	UMMZ:Mamm:174571	Digital	ark:/87602/m4/M58368	UMMZ - Division of Mammals; UMMZ-oVert Project	female	14.43
607	Laurasiatheria	Chiroptera	Vespertilionidae	Chalinolobus_gouldii	UMMZ:Mamm:164680	Digital	ark:/87602/m4/M63740	UMMZ - Division of Mammals; UMMZ-oVert Project; The oVert TCN	female	14.24
608	Euarchontoglires	Rodentia	Cricetidae	Calomys_laucha	UMMZ:Mamm:134402	Digital	ark:/87602/m4/M68595	UMMZ - Division of Mammals; UMMZ-oVert; The oVert TCN	female	14
609	Marsupialia	Diprotodontia	Acrobatidae	Acrobates_pygmaeus	NHMUK:82.7.29.23	Digital	ark:/87602/m4/M52800	TEMPO Mammals; Martín-Serra, A. and Benson, R.B. 2020. Developmental constraints do not influence long-term phenotypic evolution of marsupial forelimbs as revealed by interspecific disparity and integration patterns. The Am. Nat. 195(3): 547-560.		13.84
610	Marsupialia	Diprotodontia	Acrobatidae	Acrobates_pygmaeus	MCZ:Mamm:19480	Digital	ark:/87602/m4/M83740	MCZ-oVert; The oVert TCN	male	13.84
611	Laurasiatheria	Chiroptera	Molossidae	Molossus_molossus	UMMZ:Mamm:175614	Digital	ark:/87602/m4/M57232	UMMZ - Division of Mammals; UMMZ-oVert Project	male	13.7
612	Euarchontoglires	Rodentia	Cricetidae	Microryzomys_minutus	UMMZ:Mamm:156399	Digital	ark:/87602/m4/M68604	UMMZ - Division of Mammals; UMMZ-oVert; The oVert TCN	male	13.49
613	Laurasiatheria	Chiroptera	Phyllostomidae	Platyrrhinus_helleri	UMMZ:Mamm:168986	Digital	ark:/87602/m4/M58366	UMMZ - Division of Mammals; UMMZ-oVert Project; The oVert TCN	female	13.44
614	Laurasiatheria	Chiroptera	Phyllostomidae	Mimon_cozumelae	UMMZ:Mamm:103429	Digital	ark:/87602/m4/M58333	UMMZ - Division of Mammals; UMMZ-oVert Project	male	13.405	Body mass of genus average.
615	Laurasiatheria	Chiroptera	Rhinonycteridae	Triaenops_persicus	UMMZ:Mamm:164967	Digital	ark:/87602/m4/M55765	UMMZ - Division of Mammals; UMMZ-oVert Project; The oVert TCN		13.18
616	Laurasiatheria	Chiroptera	Rhinopomatidae	Rhinopoma_hardwickii	UMMZ:Mamm:157595	Digital	ark:/87602/m4/M61957	UMMZ - Division of Mammals; UMMZ-oVert Project; The oVert TCN	female	13.1
617	Laurasiatheria	Chiroptera	Hipposideridae	Asellia_tridens	UMMZ:Mamm:160968	Digital	ark:/87602/m4/M55749	UMMZ - Division of Mammals; UMMZ-oVert Project; The oVert TCN	male	12.94
618	Laurasiatheria	Chiroptera	Hipposideridae	Asellia_tridens	YPM:VZ:Mamm 005514	Digital	ark:/87602/m4/M65077	Yale Peabody Museum Vertebrate Zoology; The oVert TCN	female	12.94
619	Laurasiatheria	Chiroptera	Vespertilionidae	Lasiurus_borealis	YPM:VZ:Mamm 005667	Digital	ark:/87602/m4/M65076	Yale Peabody Museum Vertebrate Zoology; The oVert TCN	male	12.33
620	Euarchontoglires	Rodentia	Heteromyidae	Microdipodops_megacephalus	MVZ:Mamm:171003	Digital	ark:/87602/m4/M85197	MVZ Project; The oVert TCN		12.3
621	Laurasiatheria	Chiroptera	Phyllostomidae	Musonycteris_harrisoni	UMMZ:Mamm:110686	Digital	ark:/87602/m4/M58335	UMMZ - Division of Mammals; UMMZ-oVert Project	male	11.635		Tschapka, M.; Sperr, E.B.; Caballero-Martínez, L.A. et al. 2008. Diet and cranial morphology of Musonycteris harrisoni, a highly specialized nectar-feeding bay in western Maxico. J. Mammal. 89(4):924-932.
622	Euarchontoglires	Rodentia	Cricetidae	Scotinomys_teguina	UMMZ:Mamm:123113	Digital	ark:/87602/m4/M68591	UMMZ - Division of Mammals; UMMZ-oVert; The oVert TCN	female	11.59
623	Euarchontoglires	Rodentia	Heteromyidae	Perognathus_fasciatus	UMMZ:Mamm:75340	Digital	ark:/87602/m4/M68625	UMMZ - Division of Mammals; UMMZ-oVert; The oVert TCN	male	11.29
624	Laurasiatheria	Chiroptera	Vespertilionidae	Lasionycteris_noctivagans	UMMZ:Mamm:55198	Digital	ark:/87602/m4/M63742	UMMZ - Division of Mammals; UMMZ-oVert Project; The oVert TCN	male	11.02
625	Laurasiatheria	Chiroptera	Phyllostomidae	Anoura_caudifer	UMMZ:Mamm:168870	Digital	ark:/87602/m4/M57220	UMMZ - Division of Mammals; UMMZ-oVert Project	female	10.81
626	Euarchontoglires	Rodentia	Cricetidae	Reithrodontomys_megalotis	UMMZ:Mamm:55891	Digital	ark:/87602/m4/M68620	UMMZ - Division of Mammals; UMMZ-oVert; The oVert TCN	male	10.72
627	Laurasiatheria	Chiroptera	Emballonuridae	Coleura_afra	MCZ:Mamm:59781	Digital	ark:/87602/m4/M79516	MCZ-oVert; The oVert TCN	male	10.68
628	Laurasiatheria	Chiroptera	Phyllostomidae	Ametrida_centurio	YPM:VZ:Mamm 015120	Digital	ark:/87602/m4/M64842	Yale Peabody Museum Vertebrate Zoology; The oVert TCN		10.61
629	Laurasiatheria	Chiroptera	Hipposideridae	Hipposideros_speoris	YPM:VZ:Mamm 005627	Digital	ark:/87602/m4/M65071	Yale Peabody Museum Vertebrate Zoology; The oVert TCN		10.39
630	Laurasiatheria	Chiroptera	Phyllostomidae	Lampronycteris_brachyotis	UMMZ:Mamm:122288	Digital	ark:/87602/m4/M58347	UMMZ - Division of Mammals; UMMZ-oVert Project	male	10.39
631	Laurasiatheria	Chiroptera	Phyllostomidae	Glossophaga_soricina	YPM:VZ:Mamm 005536	Digital	ark:/87602/m4/M64822	Yale Peabody Museum Vertebrate Zoology; The oVert TCN		9.97
632	Laurasiatheria	Chiroptera	Phyllostomidae	Glossophaga_soricina	UMMZ:Mamm:160901	Digital	ark:/87602/m4/M58359	UMMZ - Division of Mammals; UMMZ-oVert Project	male	9.97
633	Laurasiatheria	Eulipotyphla	Soricidae	Crocidura_russula	UMMZ:Mamm:157845	Digital	doi:10.17602/M2/M68608	UMMZ - Division of Mammals; UMMZ-oVert Project; The oVert TCN	female	9.89
634	Laurasiatheria	Chiroptera	Emballonuridae	Peropteryx_kappleri	UMMZ:Mamm:168863	Digital	ark:/87602/m4/M58365	UMMZ - Division of Mammals; UMMZ-oVert Project	female	9.85
635	Marsupialia	Diprotodontia	Tarsipedidae	Tarsipes_rostratus	UMMZ:Mamm:122547	Digital	doi:10.17602/M2/M82391	UMMZ - Division of Mammals; TEMPO Mammals; Martín-Serra, A. and Benson, R.B. 2020. Developmental constraints do not influence long-term phenotypic evolution of marsupial forelimbs as revealed by interspecific disparity and integration patterns. The Am. Nat. 195(3): 547-560.		9.66
636	Laurasiatheria	Chiroptera	Phyllostomidae	Rhinophylla_pumilio	YPM:VZ:Mamm 014632	Digital	ark:/87602/m4/M64838	Yale Peabody Museum Vertebrate Zoology; The oVert TCN		9.58
637	Laurasiatheria	Eulipotyphla	Talpidae	Neurotrichus_gibbsii	UMMZ:Mamm:114715	Digital	ark:/87602/m4/M65515	UMMZ - Division of Mammals; UMMZ-oVert Project; The oVert TCN		9.56
638	Laurasiatheria	Chiroptera	Mormoopidae	Pteronotus_davyi	YPM:VZ:Mamm 005812	Digital	ark:/87602/m4/M64825	Yale Peabody Museum Vertebrate Zoology; The oVert TCN		9.52
639	Euarchontoglires	Rodentia	Dipodidae	Salpingotus_crassicauda	UMMZ:Mamm:120123	Digital	ark:/87602/m4/M68587	UMMZ - Division of Mammals; UMMZ-oVert; The oVert TCN		9.5		Freudenthal, M and Martín-Suárez, E. 2013. Estimating body mass of fossil rodents. Scripta Geol. 145: 1-130.
640	Laurasiatheria	Chiroptera	Emballonuridae	Cormura_brevirostris	UMMZ:Mamm:175633	Digital	ark:/87602/m4/M55751	UMMZ - Division of Mammals; UMMZ-oVert Project; The oVert TCN	female	9.26
641	Laurasiatheria	Chiroptera	Nycteridae	Nycteris_thebaica	UMMZ:Mamm:164963	Digital	ark:/87602/m4/M96231	UMMZ - Division of Mammals; UMMZ-oVert Project; The oVert TCN	female	9.2
642	Laurasiatheria	Chiroptera	Vespertilionidae	Nycticeius_humeralis	UMMZ:Mamm:81282	Digital	ark:/87602/m4/M63747	UMMZ - Division of Mammals; UMMZ-oVert Project; The oVert TCN	female	9.12
643	Laurasiatheria	Chiroptera	Rhinolophidae	Rhinolophus_arcuatus	UMMZ:Mamm:158869	Digital	ark:/87602/m4/M63738	UMMZ - Division of Mammals; UMMZ-oVert Project; The oVert TCN	female	8.98
644	Laurasiatheria	Chiroptera	Vespertilionidae	Nyctophilus_geoffroyi	UMMZ:Mamm:164682	Digital	ark:/87602/m4/M64404	UMMZ - Division of Mammals; UMMZ-oVert Project; The oVert TCN	male	8.9		Turbill, C. and Geiser, F. 2006. Thermal physiology of pregnant and lactating female and male long-eared bats, Nyctophylus geoffroyi and N. gouldi. J. Comp. Physiol. B. 176: 165–172
645	Laurasiatheria	Chiroptera	Phyllostomidae	Lionycteris_spurrelli	UMMZ:Mamm:160890	Digital	ark:/87602/m4/M58358	UMMZ - Division of Mammals; UMMZ-oVert Project	female	8.85
646	Laurasiatheria	Chiroptera	Phyllostomidae	Vampyressa_pusilla	UMMZ:Mamm:134119	Digital	ark:/87602/m4/M58352	UMMZ - Division of Mammals; UMMZ-oVert Project	female	8.77
647	Laurasiatheria	Chiroptera	Vespertilionidae	Barbastella_barbastellus	UMMZ:Mamm:113297	Digital	ark:/87602/m4/M61948	UMMZ - Division of Mammals; UMMZ-oVert Project; The oVert TCN	female	8.31
648	Laurasiatheria	Chiroptera	Vespertilionidae	Plecotus_auritus	UMMZ:Mamm:113298	Digital	ark:/87602/m4/M63734	UMMZ - Division of Mammals; UMMZ-oVert Project; The oVert TCN	female	8.19
649	Afrotheria	Afrosoricida	Tenrecidae	Microgale_longicaudata	UMMZ:Mamm:174711	Digital	doi:10.17602/M2/M64408	UMMZ-oVert; The oVert TCN; UMMZ - Division of Mammals		8.08
650	Laurasiatheria	Chiroptera	Phyllostomidae	Macrotus_waterhousii	UMMZ:Mamm:79945	Digital	ark:/87602/m4/M58374	UMMZ - Division of Mammals; UMMZ-oVert Project	male	8.02
651	Laurasiatheria	Chiroptera	Phyllostomidae	Choeroniscus_godmani	UMMZ:Mamm:113583	Digital	ark:/87602/m4/M58338	UMMZ - Division of Mammals; UMMZ-oVert Project	male	7.9
652	Laurasiatheria	Chiroptera	Vespertilionidae	Myotis_lucifugus	UMMZ:Mamm:58828	Digital	doi:10.17602/M2/M63746	UMMZ - Division of Mammals; UMMZ-oVert Project; The oVert TCN	female	7.8
653	Euarchontoglires	Rodentia	Cricetidae	Baiomys_taylori	UMMZ:Mamm:108722	Digital	ark:/87602/m4/M68560	UMMZ - Division of Mammals; UMMZ-oVert; The oVert TCN	male	7.43
654	Laurasiatheria	Chiroptera	Miniopteridae	Miniopterus_australis	UMMZ:Mamm:160356	Digital	ark:/87602/m4/M61959	UMMZ - Division of Mammals; UMMZ-oVert Project; The oVert TCN	female	7.4
655	Euarchontoglires	Rodentia	Muridae	Micromys_minutus	UMMZ:Mamm:108469	Digital	ark:/87602/m4/M82214	UMMZ - Division of Mammals; UMMZ-oVert; The oVert TCN	male	6.99
656	Laurasiatheria	Eulipotyphla	Soricidae	Episoriculus_caudatus	UMMZ:Mamm:122889	Digital	doi:10.17602/M2/M68589	UMMZ - Division of Mammals; UMMZ-oVert Project; The oVert TCN	female	6.95	E. fumidus body mass.
657	Afrotheria	Afrosoricida	Tenrecidae	Geogale_aurita	UMMZ:Mamm:167220	Digital	doi:10.17602/M2/M64406	UMMZ-oVert; The oVert TCN; UMMZ - Division of Mammals		6.69
658	Laurasiatheria	Chiroptera	Emballonuridae	Balantiopteryx_plicata	UMMZ:Mamm:109740	Digital	doi:10.17602/M2/M57255	UMMZ - Division of Mammals; UMMZ-oVert Project	female	6.57
659	Laurasiatheria	Chiroptera	Molossidae	Molossops_temminckii	UMMZ:Mamm:134262	Digital	ark:/87602/m4/M57261	UMMZ - Division of Mammals; UMMZ-oVert Project	female	5.86
660	Laurasiatheria	Chiroptera	Emballonuridae	Saccopteryx_leptura	UMMZ:Mamm:115892	Digital	ark:/87602/m4/M68582	UMMZ - Division of Mammals; UMMZ-oVert Project; The oVert TCN	female	5.745	Body mass of genus average.
661	Laurasiatheria	Chiroptera	Natalidae	Natalus_stramineus	UMMZ:Mamm:122343	Digital	ark:/87602/m4/M57199	UMMZ - Division of Mammals; UMMZ-oVert Project	male	5.68
662	Laurasiatheria	Chiroptera	Phyllostomidae	Ectophylla_alba	UMMZ:Mamm:125633	Digital	ark:/87602/m4/M58349	UMMZ - Division of Mammals; UMMZ-oVert Project	male	5.55
663	Laurasiatheria	Chiroptera	Emballonuridae	Emballonura_alecto	UMMZ:Mamm:156850	Digital	ark:/87602/m4/M55755	UMMZ - Division of Mammals; UMMZ-oVert Project; The oVert TCN	male	5.25
664	Laurasiatheria	Chiroptera	Vespertilionidae	Rhogeessa_tumida	UMMZ:Mamm:114489	Digital	ark:/87602/m4/M63735	UMMZ - Division of Mammals; UMMZ-oVert Project; The oVert TCN	male	4.58
665	Laurasiatheria	Chiroptera	Thyropteridae	Thyroptera_tricolor	UMMZ:Mamm:120402	Digital	doi:10.17602/M2/M63736	UMMZ - Division of Mammals; UMMZ-oVert Project; The oVert TCN	female	4.52
666	Laurasiatheria	Chiroptera	Vespertilionidae	Kerivoula_picta	UMMZ:Mamm:172244	Digital	ark:/87602/m4/M63742	UMMZ - Division of Mammals; UMMZ-oVert Project; The oVert TCN	female	4.5
667	Laurasiatheria	Eulipotyphla	Soricidae	Sorex_cinereus	UMMZ:Mamm:175520	Digital	doi:10.17602/M2/M64409	UMMZ - Division of Mammals; UMMZ-oVert Project; The oVert TCN	male	4.2
668	Laurasiatheria	Chiroptera	Emballonuridae	Rhynchonycteris_naso	UMMZ:Mamm:115887	Digital	ark:/87602/m4/M58343	UMMZ - Division of Mammals; UMMZ-oVert Project	female	4.14
669	Laurasiatheria	Chiroptera	Furipteridae	Amorphochilus	YPM:VZ:Mamm 005693	Digital	ark:/87602/m4/M64836	Yale Peabody Museum Vertebrate Zoology; The oVert TCN		3.3		Blessing, S. 2002. "Amorphochilus schnablii" (On-line), Animal Diversity Web. Accessed February 17, 2022 at https://animaldiversity.org/accounts/Amorphochilus_schnablii/
670	Laurasiatheria	Chiroptera	Furipteridae	Furipterus_horrens	UMMZ:Mamm:175646	Digital	doi:10.17602/M2/M57236	UMMZ - Division of Mammals; UMMZ-oVert Project; The oVert TCN	male	3.15
